# Supplementary material for: The Roots of Neorautanenia mitis (A. Rich) Verdcourt: Further Evidence of Its Antidiarrhoeal Activity
Source: MDPI journal article supplement (doi:10.3390/molecules28020673), 2023-01-09
Supplement: s1 [file s1]

## Supplementary Materials

### **The Roots of *Neorautanenia mitis* (A. Rich) Verdcourt; Further evidence on its anti-diarrheal activity**

Christiana J. Dawurung<sup>1,2\*</sup>, Joy Gararawa Usman<sup>3</sup>, Jurbe G. Gotep<sup>3</sup>, and Stephen G. Pyne<sup>1</sup>.

<sup>1</sup>

School of Chemistry and Molecular Bioscience, Faculty of Science Medicine and Health,  
University of Wollongong, Wollongong, New South Wales, 2522, Australia.

<sup>2</sup> Department of Veterinary Physiology, Biochemistry and Pharmacology University of Jos, Jos  
Plateau State, Nigeria.

<sup>3</sup>Drug Development Division, National Veterinary Research Institute (NVRI) Vom, Jos, Plateau  
State, Nigeria.

\*Corresponding author email: golkada@yahoo.com

## CONTENTS

|                                                                                                           |    |
|-----------------------------------------------------------------------------------------------------------|----|
| <b><sup>1</sup>H NMR Spectra</b> .....                                                                    | 4  |
| Figure S1. <sup>1</sup> H NMR Spectrum of Compound <b>1</b> (500 MHz, CDCl <sub>3</sub> ).....            | 4  |
| Figure S2. <sup>1</sup> H NMR Spectrum of Compound <b>2</b> (400 MHz, CDCl <sub>3</sub> ) .....           | 5  |
| Figure S3. <sup>1</sup> H NMR Spectrum of Compound <b>3</b> (400 MHz, CDCl <sub>3</sub> ).....            | 6  |
| Figure S4. <sup>1</sup> H NMR Spectrum of Compound <b>4</b> (400 MHz, CDCl <sub>3</sub> ).....            | 7  |
| Figure S5. <sup>1</sup> H NMR Spectrum of Compound <b>6</b> (400 MHz, CDCl <sub>3</sub> ).....            | 8  |
| Figure S6. <sup>1</sup> H NMR Spectrum of Compound <b>7</b> (500 MHz, CDCl <sub>3</sub> ).....            | 9  |
| Figure S7. <sup>1</sup> H NMR Spectrum of Compound <b>8</b> (500 MHz, CDCl <sub>3</sub> ).....            | 10 |
| Figure S8. <sup>1</sup> H NMR Spectrum of Compound <b>9</b> ((400 MHz, CDCl <sub>3</sub> ).....           | 11 |
| Figure S9. <sup>1</sup> H NMR Spectrum of Compound <b>10</b> (400 MHz, CDCl <sub>3</sub> ).....           | 12 |
| Figure S10. <sup>1</sup> H NMR Spectrum of Compound <b>11</b> (500 MHz, CDCl <sub>3</sub> ).....          | 13 |
| Figure S11. <sup>1</sup> H NMR Spectrum of Compound <b>12</b> (500 MHz, CDCl <sub>3</sub> ).....          | 14 |
| Figure S12. <sup>1</sup> H NMR Spectrum of Compound <b>13</b> (400 MHz, CDCl <sub>3</sub> ).....          | 15 |
| Figure S13. <sup>1</sup> H NMR Spectrum of Compound <b>14</b> (500 MHz, CDCl <sub>3</sub> ).....          | 16 |
| Figure S14. <sup>1</sup> H NMR Spectrum of Compound <b>15</b> (400 MHz, CDCl <sub>3</sub> ).....          | 17 |
| Figure S15. <sup>1</sup> H NMR Spectrum of Compound <b>16</b> (500 MHz, CDCl <sub>3</sub> ).....          | 18 |
| Figure S16. <sup>1</sup> H NMR Spectrum Compound <b>17</b> (500 MHz, CDCl <sub>3</sub> ).....             | 19 |
| Figure S17. <sup>1</sup> H NMR Spectrum Compound <b>18</b> (400 MHz, CDCl <sub>3</sub> ).....             | 20 |
| Figure S18. <sup>1</sup> H NMR Spectrum of Compound <b>19</b> (500 MHz, MeOD).....                        | 21 |
| Figure S19. <sup>1</sup> H NMR Spectrum of Compound <b>20</b> (500 MHz, MeOD).....                        | 22 |
| <b>Tables</b> .....                                                                                       | 23 |
| Table S1. Experimental and Literature <sup>1</sup> H NMR data of compound 1.....                          | 23 |
| Table S2. Experimental and Literature <sup>1</sup> H NMR data of compound 4.....                          | 24 |
| Table S3. Experimental and Literature <sup>1</sup> H NMR and <sup>13</sup> Carbon data of compound 5..... | 25 |

|                                                                                                    |           |
|----------------------------------------------------------------------------------------------------|-----------|
| Table S4. Experimental and Literature $^1\text{H}$ NMR data of compound 12.....                    | 26        |
| Table S5. Experimental and Literature $^1\text{H}$ NMR data of compound 13 .....                   | 27        |
| Table S6. Experimental and Literature $^1\text{H}$ NMR data of compounds 11 and 15.....            | 28        |
| Table S7. Experimental and Literature $^{13}\text{C}$ NMR data of Compounds 19 and 20 .....        | 30        |
| Table S8. Experimental and Literature $^{13}\text{C}$ NMR of Data of compounds 2, 6, 7, 9, 10..... | 32        |
| Table S9. Experimental and Literature $^{13}\text{C}$ NMR of Data of compounds 14, 16, 17, 18....  | 33        |
| Table S10. Crystal Data and Structure Refinement for Compound 11.....                              | 34        |
| Table S11. Crystal Data and Structure Refinement for Compound 20.....                              | 35        |
| Table S12. Melting Point and Optical rotation of Compounds 1-20.....                               | 36        |
| <b>Compound 8 Spectra.....</b>                                                                     | <b>37</b> |
| Figure S20. $^{13}\text{C}$ NMR Spectrum of Compound <b>8</b> (126 MHz, $\text{CDCl}_3$ ).....     | 37        |
| Figure S21. DEPT Spectrum of Compound <b>8</b> (500 MHz, $\text{CDCl}_3$ ).....                    | 38        |
| Figure S22. HSQC Spectrum of Compound <b>8</b> (500 MHz, $\text{CDCl}_3$ ).....                    | 39        |
| Figure S23. HSQC Spectrum of Compound <b>8</b> (500 MHz, $\text{CDCl}_3$ ).....                    | 40        |
| Figure S24. COSY Spectrum of Compound <b>8</b> (500 MHz, $\text{CDCl}_3$ ).....                    | 41        |
| <b>MS for compound 8.....</b>                                                                      | <b>42</b> |
| <b>References.....</b>                                                                             | <b>43</b> |

cj1\_170815\_45  
F4F5S

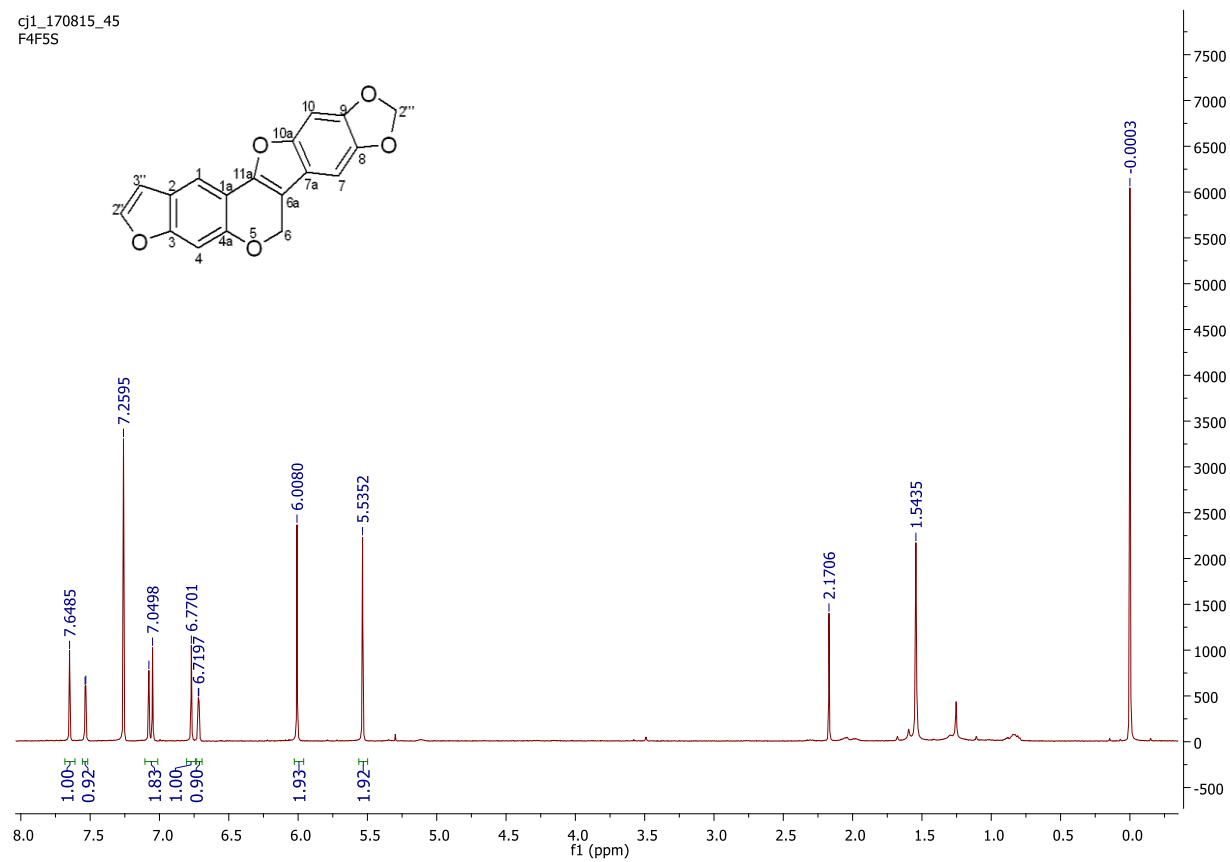

**Figure S1.** <sup>1</sup>H NMR Spectrum of Compound **1** (500 MHz, CDCl<sub>3</sub>)

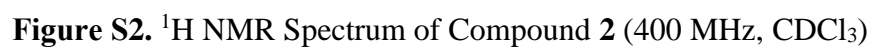

cj1\_170812\_38  
F6F5

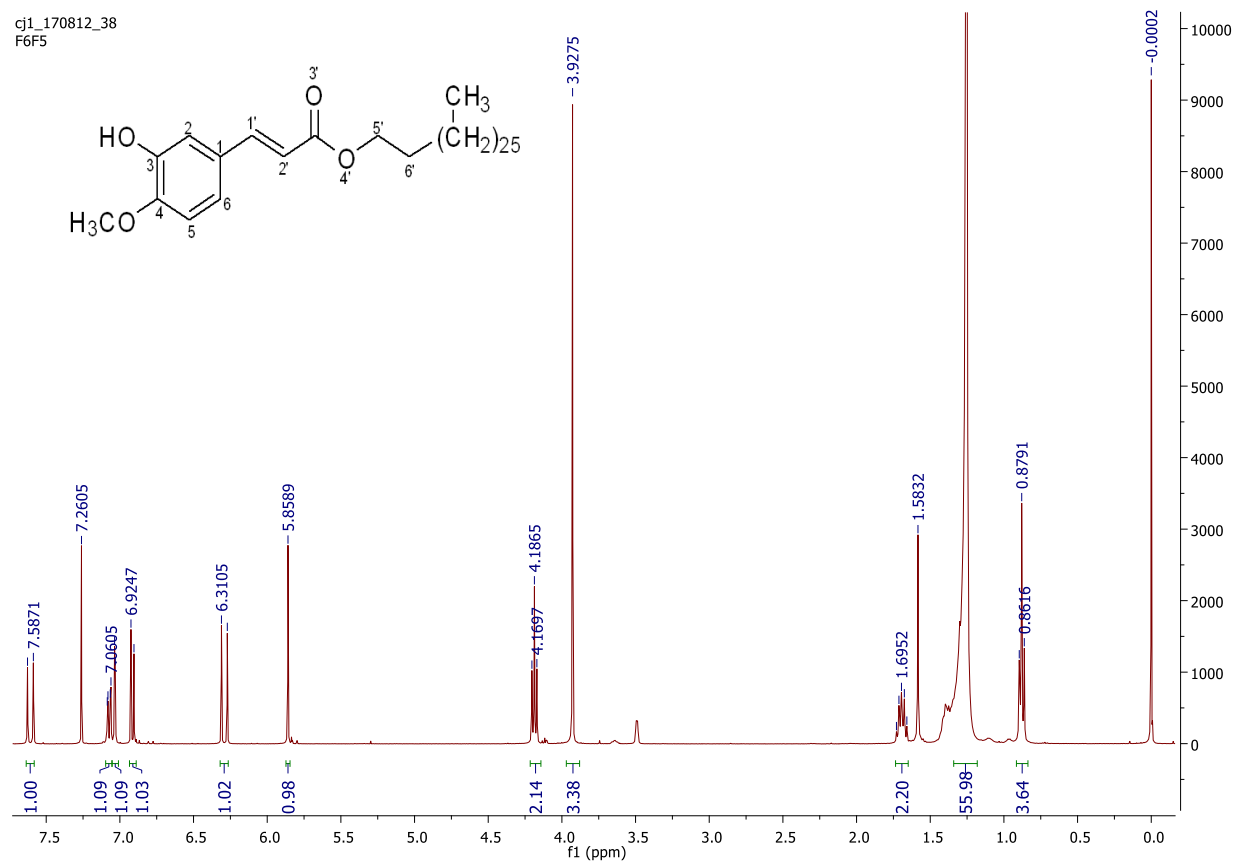

**Figure S3.** <sup>1</sup>H NMR Spectrum of Compound **3** (400 MHz, CDCl<sub>3</sub>)

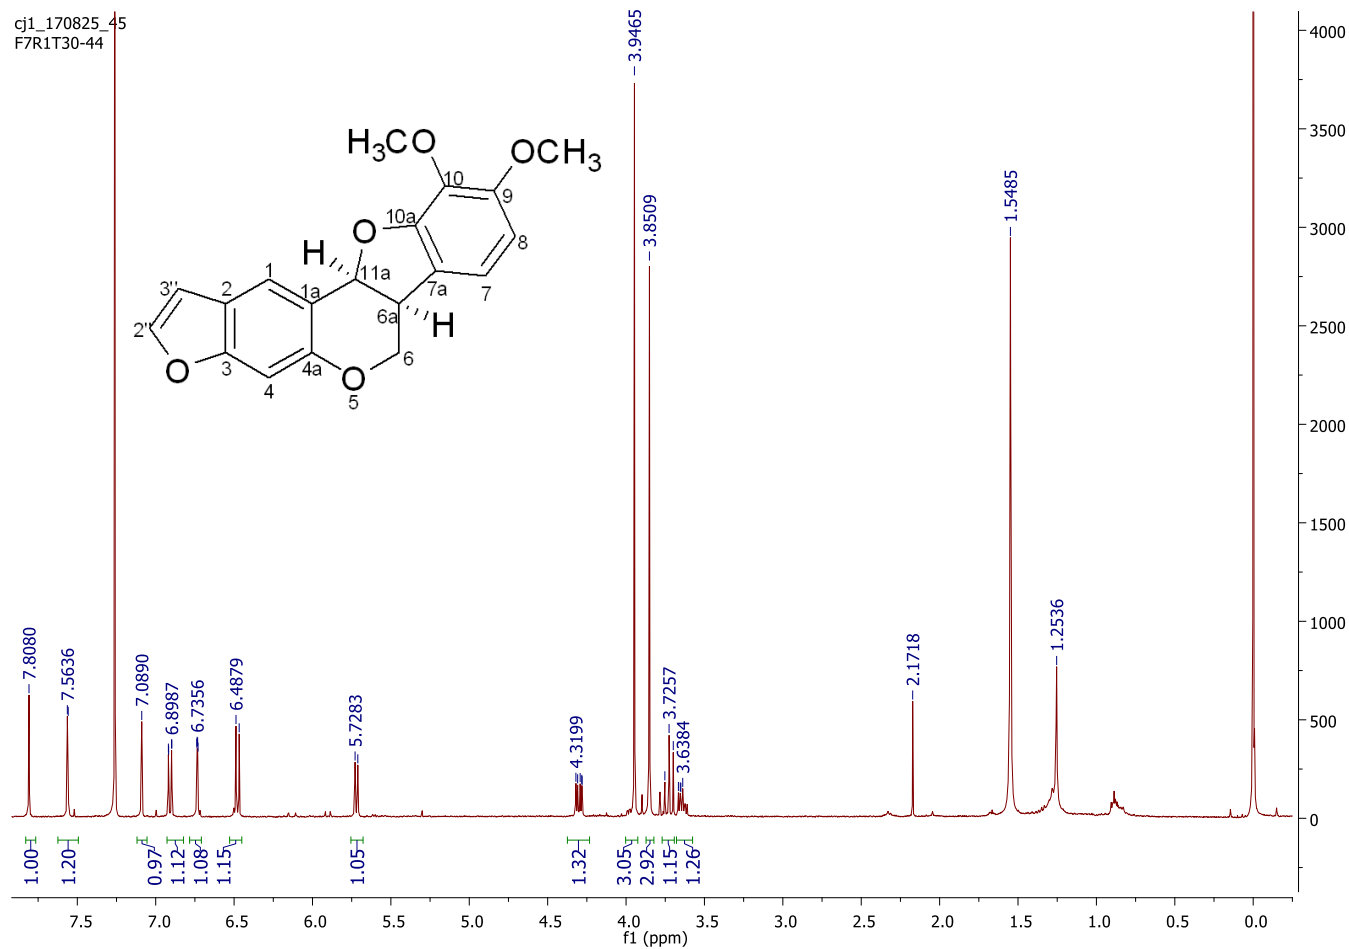

**Figure S4.**  $^1\text{H}$  NMR Spectrum of Compound 4 (400 MHz,  $\text{CDCl}_3$ )

cj1\_170718\_44  
F27f3

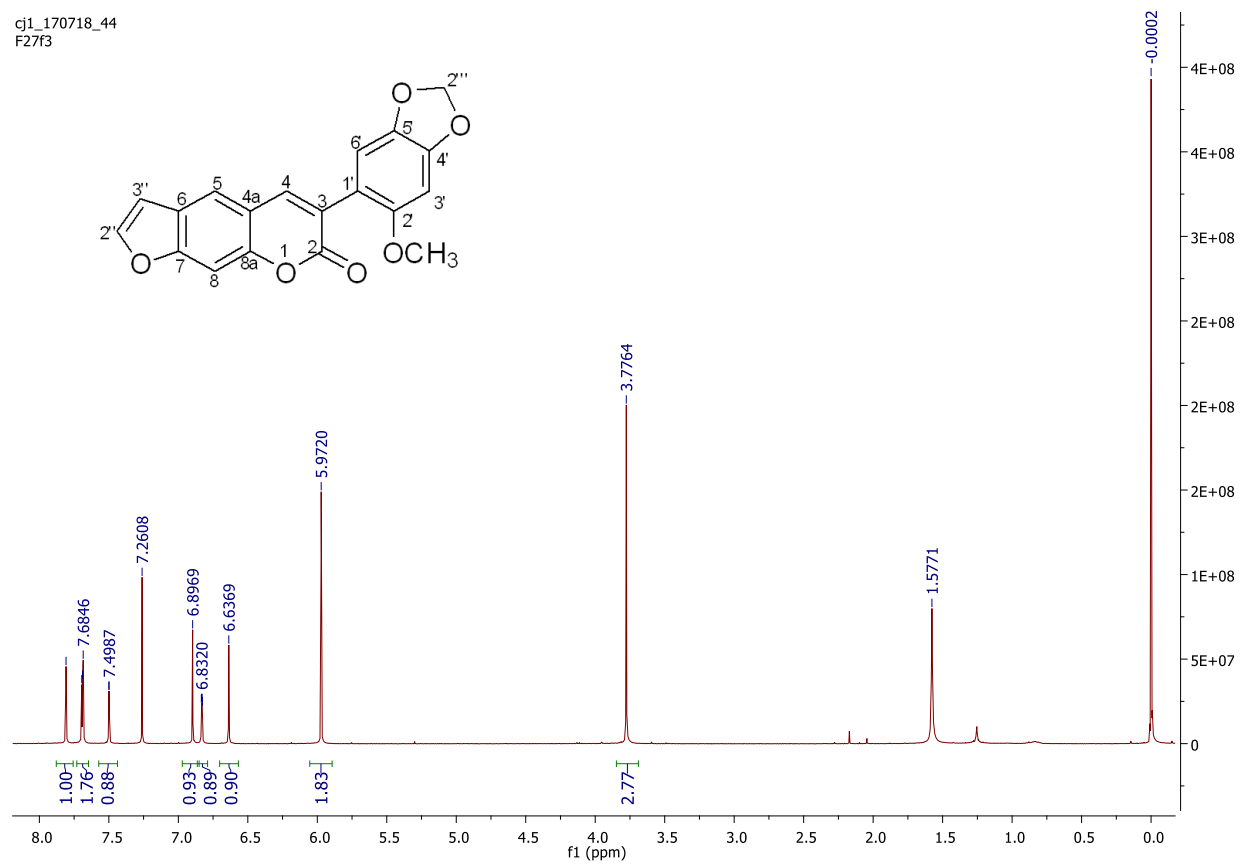

**Figure S5.** <sup>1</sup>H NMR Spectrum of Compound **6** (400 MHz, CDCl<sub>3</sub>)



cjd\_170906\_31

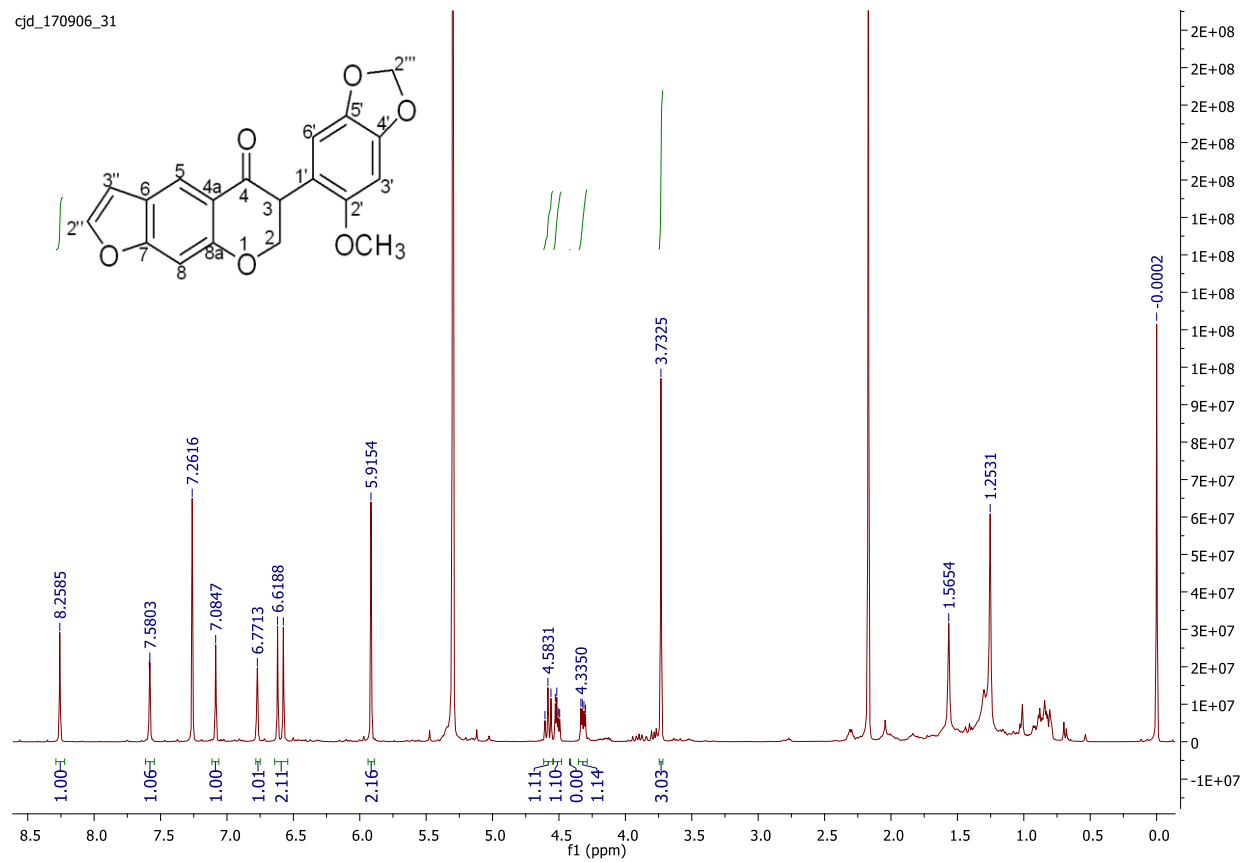

**Figure S6.** <sup>1</sup>H NMR Spectrum of Compound **7** (500 MHz, CDCl<sub>3</sub>)

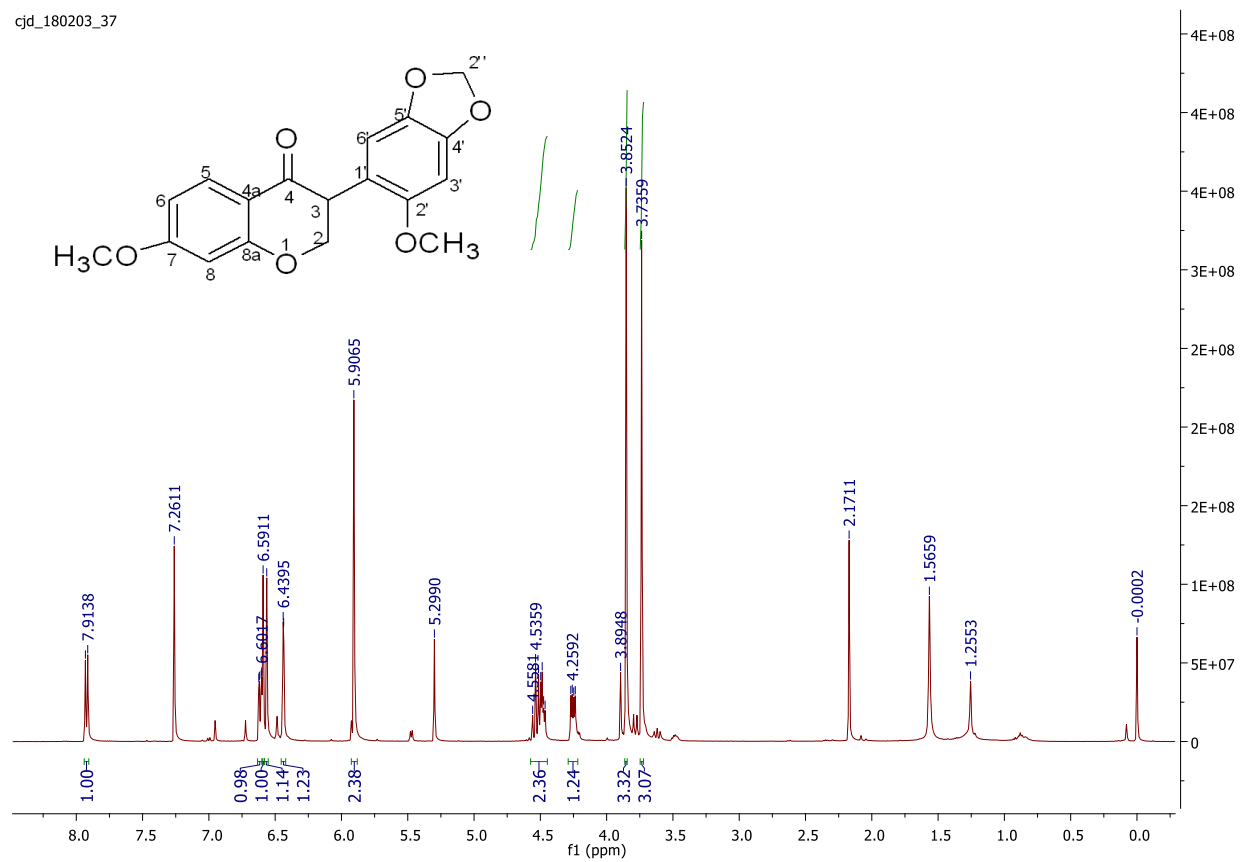

**Figure S7.** <sup>1</sup>H NMR Spectrum of Compound **8** (500 MHz, CDCl<sub>3</sub>)

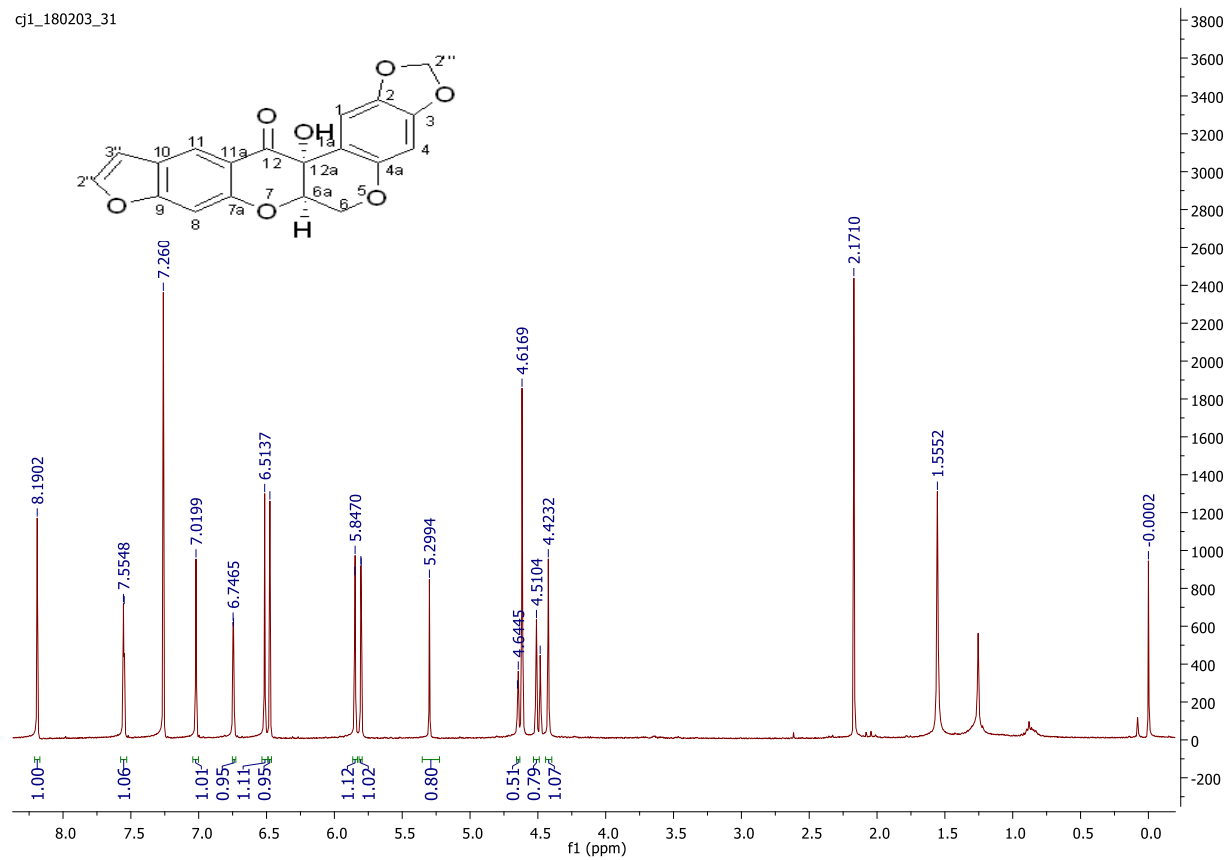

**Figure S8.**  $^1\text{H}$  NMR Spectrum of Compound **9** ((400 MHz,  $\text{CDCl}_3$ ))

cj1\_170505\_41  
F2 Proton

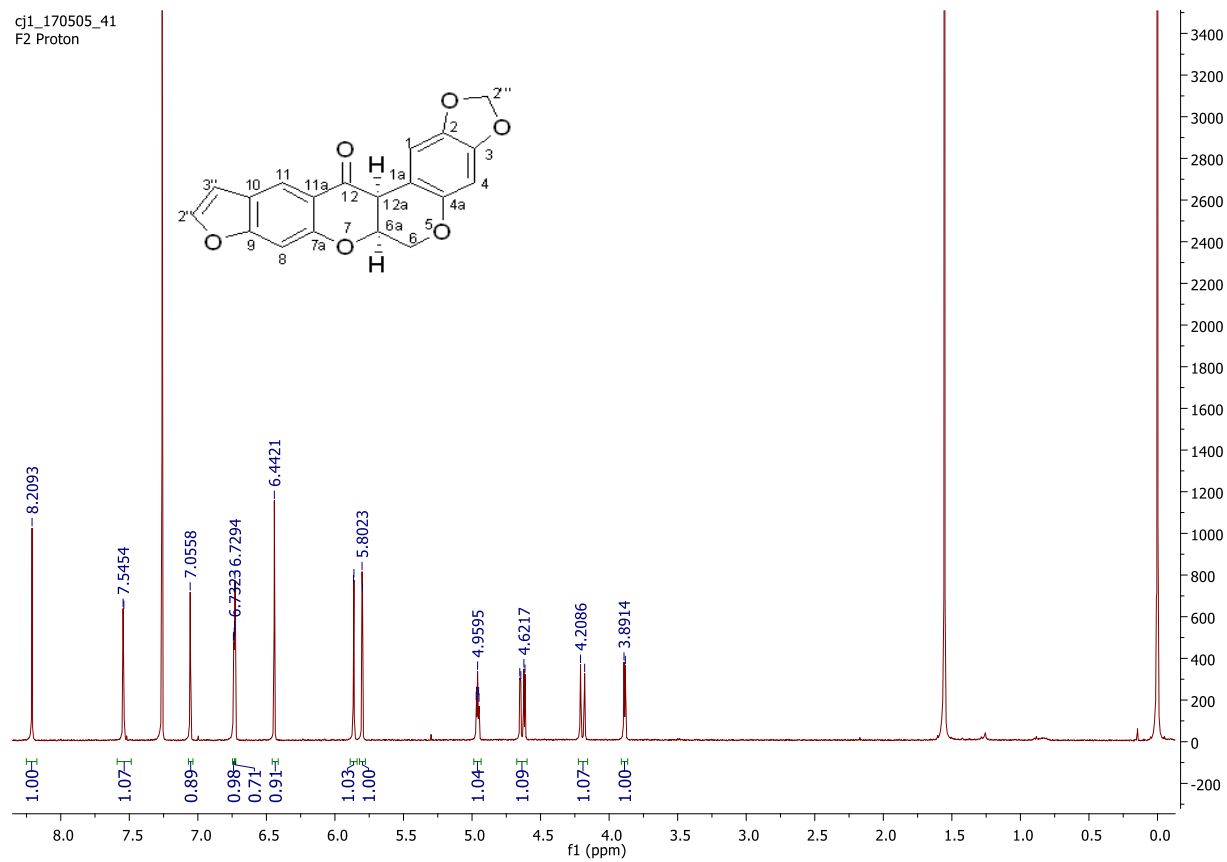

cjd\_170926\_35  
F15F5

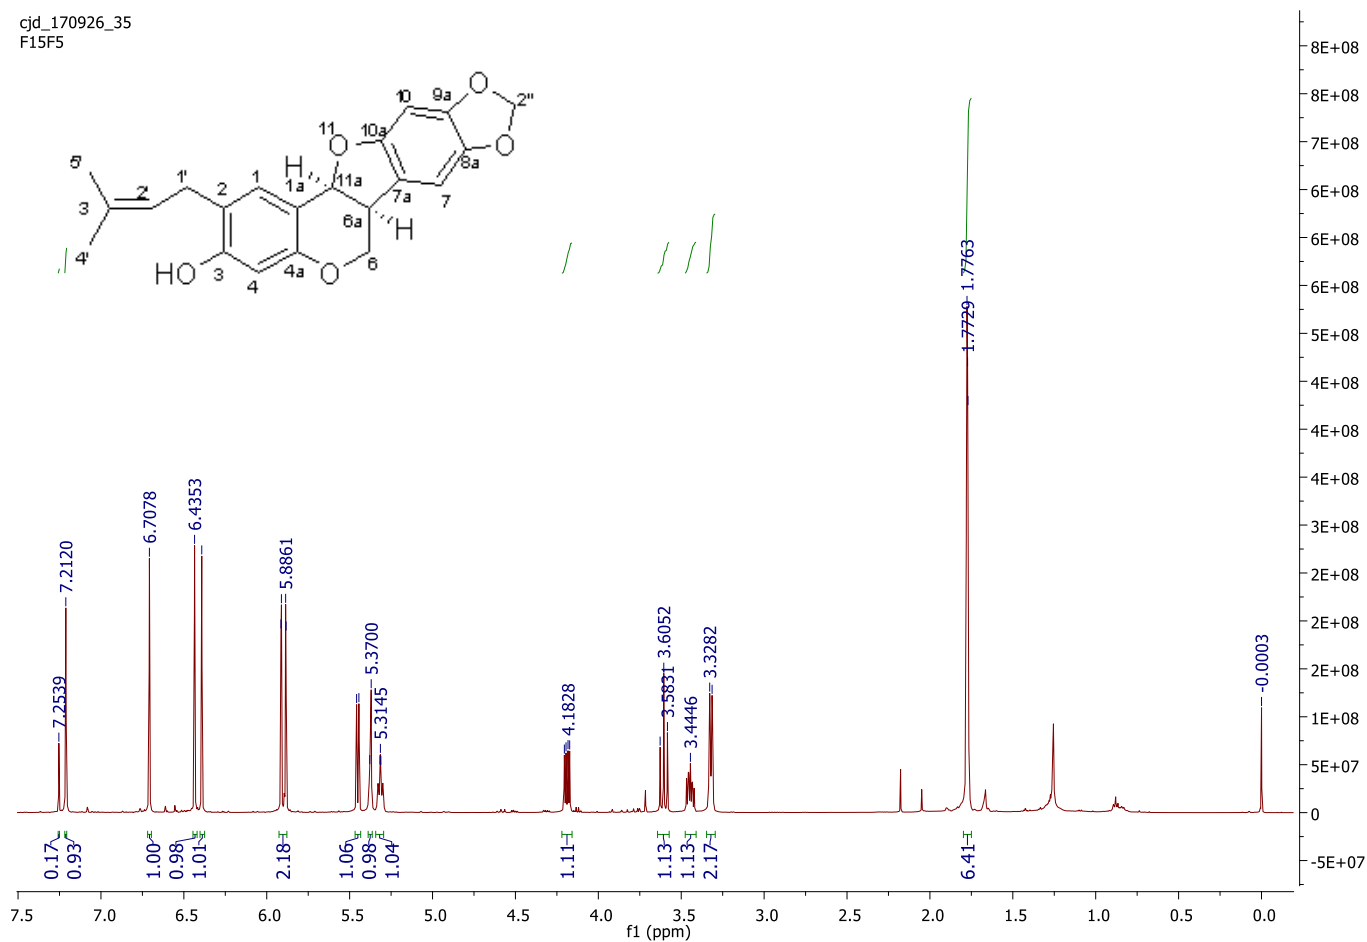

**Figure S10.** <sup>1</sup>H NMR Spectrum of Compound **11** (500 MHz, CDCl<sub>3</sub>)

cjd\_180119\_23  
F15F8

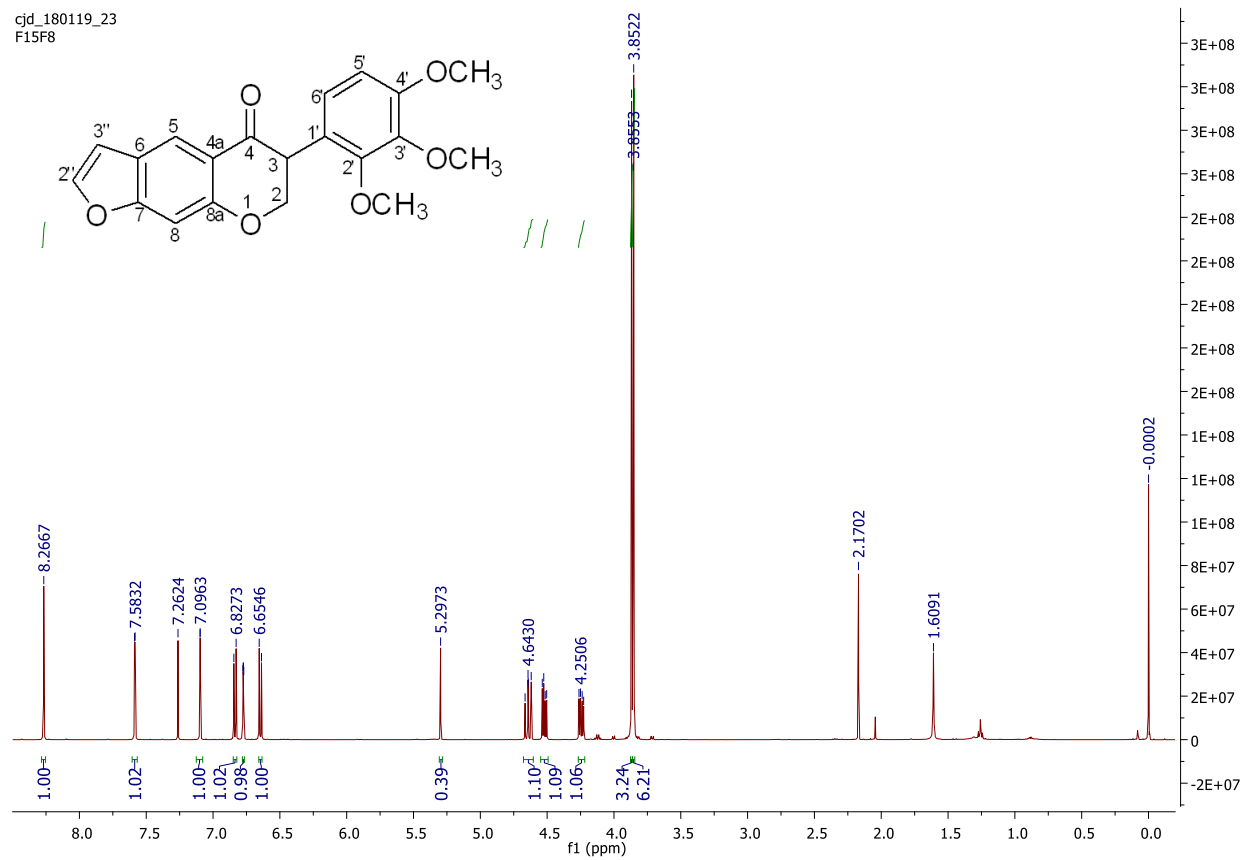

**Figure S11.** <sup>1</sup>H NMR Spectrum of Compound **12** (500 MHz, CDCl<sub>3</sub>)

cj1\_180202\_22

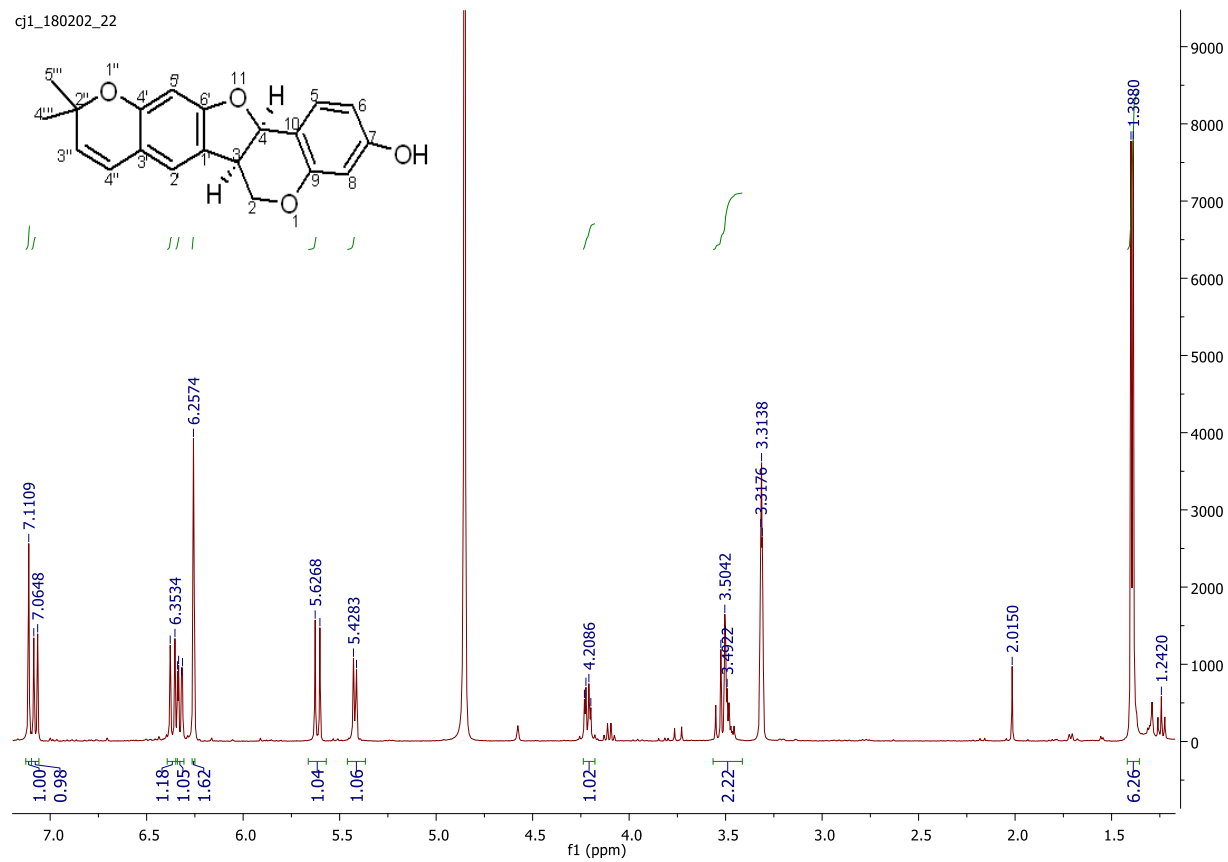

**Figure S12.** <sup>1</sup>H NMR Spectrum of Compound **13** (400 MHz, CDCl<sub>3</sub>)

pm3180124\_31  
F15F8F4TLC

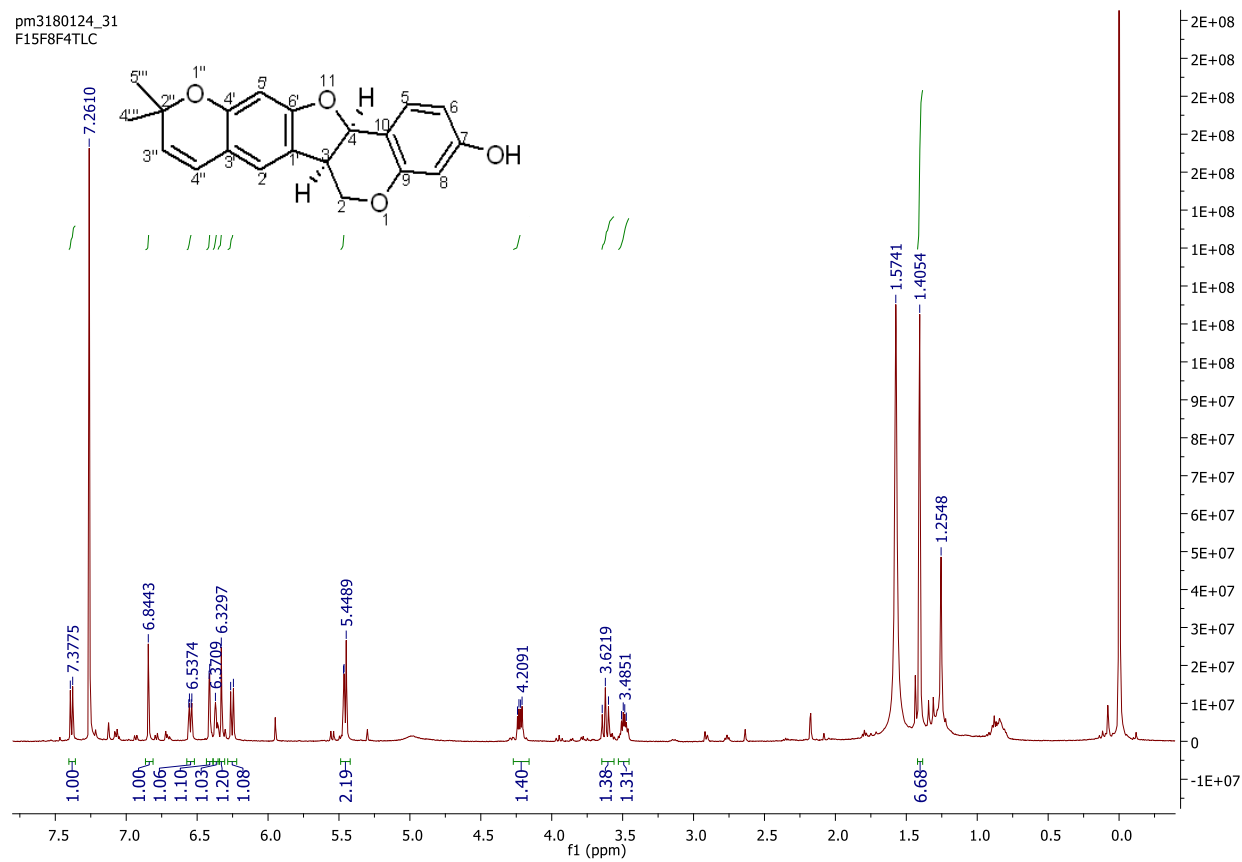

**Figure S13.** <sup>1</sup>H NMR Spectrum of Compound **14** (500 MHz, CDCl<sub>3</sub>)



cj1\_170804\_45  
F21f567N

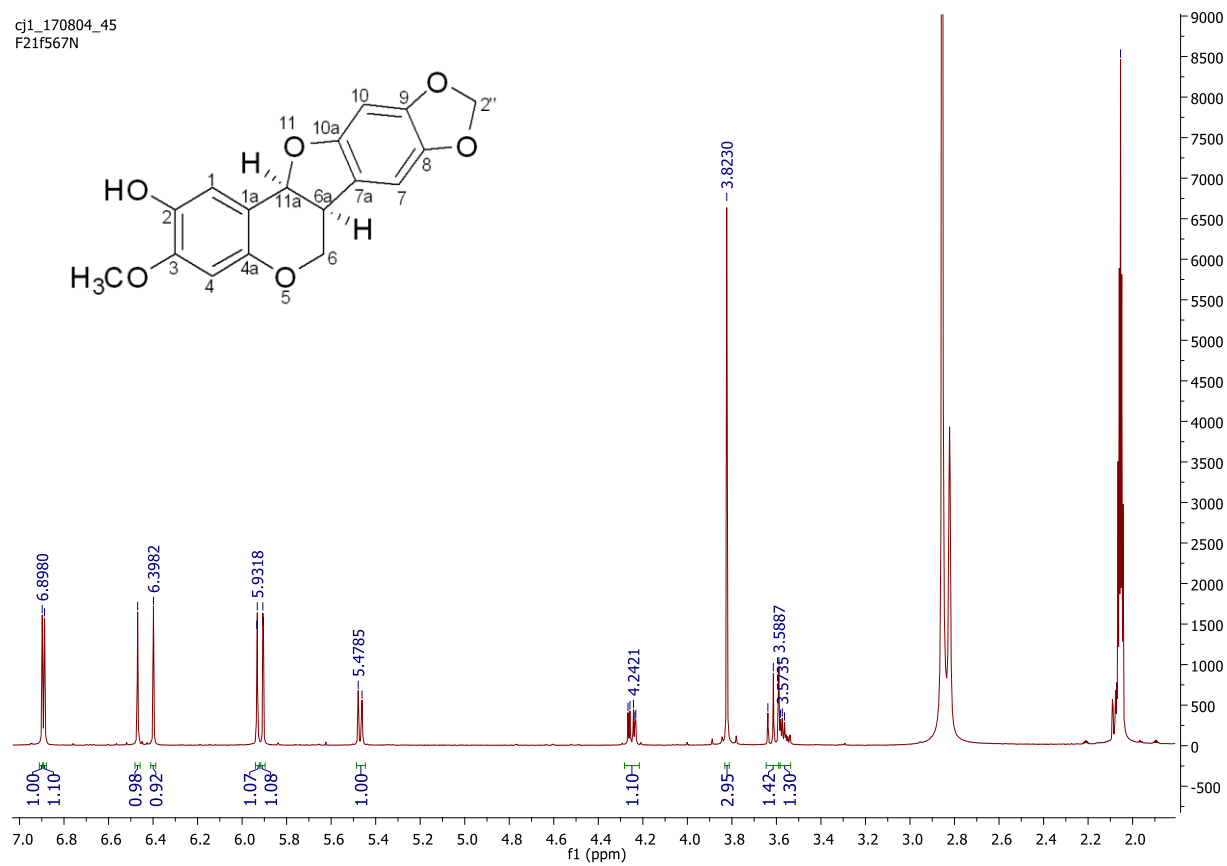

**Figure S14.** <sup>1</sup>H NMR Spectrum of Compound **15** (400 MHz, CDCl<sub>3</sub>)

cjd\_180117\_22  
F28-30F15-19MeOH Sol F2wash

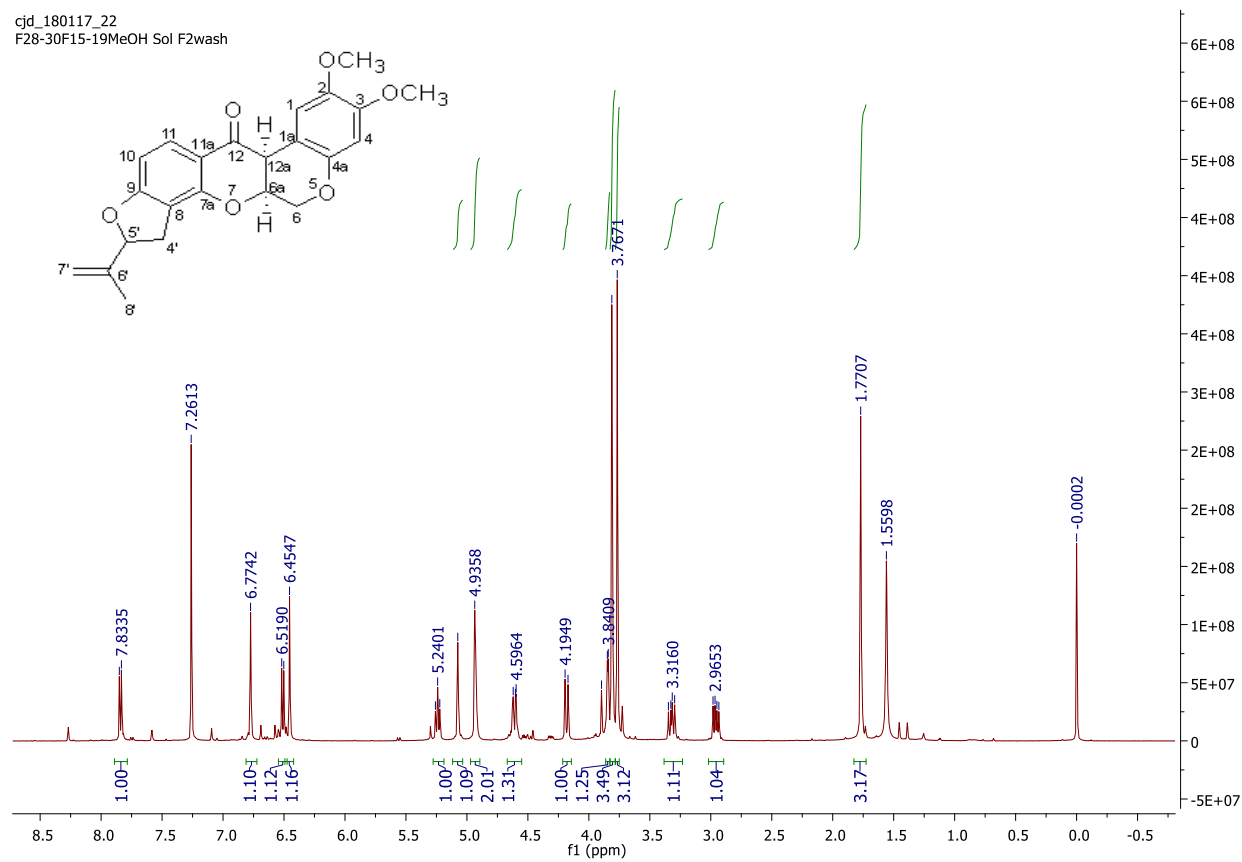

**Figure S15.** <sup>1</sup>H NMR Spectrum of Compound **16** (500 MHz, CDCl<sub>3</sub>)

cjd\_171108\_24  
F31-32DYF1

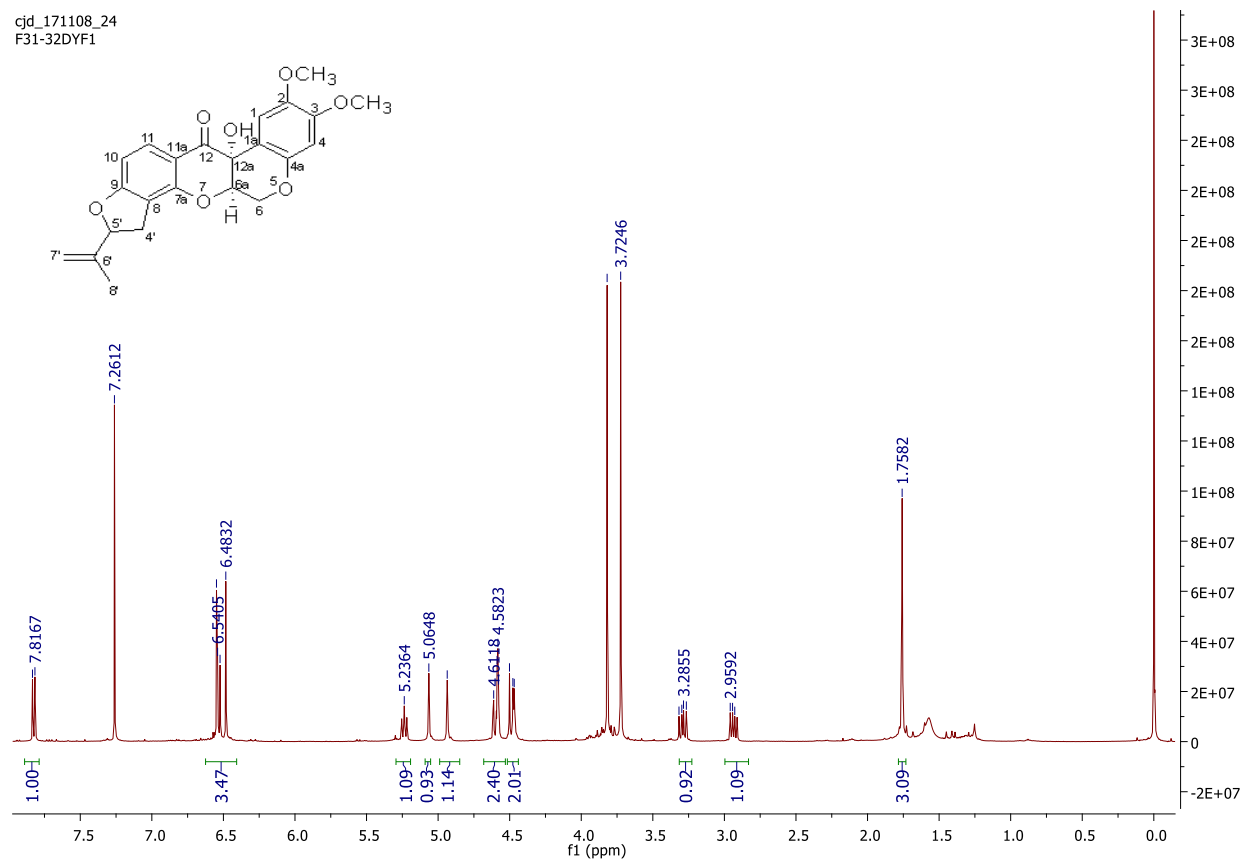

**Figure S16.** <sup>1</sup>H NMR Spectrum Compound **17** (500 MHz, CDCl<sub>3</sub>)

cj1\_170716\_34  
F2f6\*

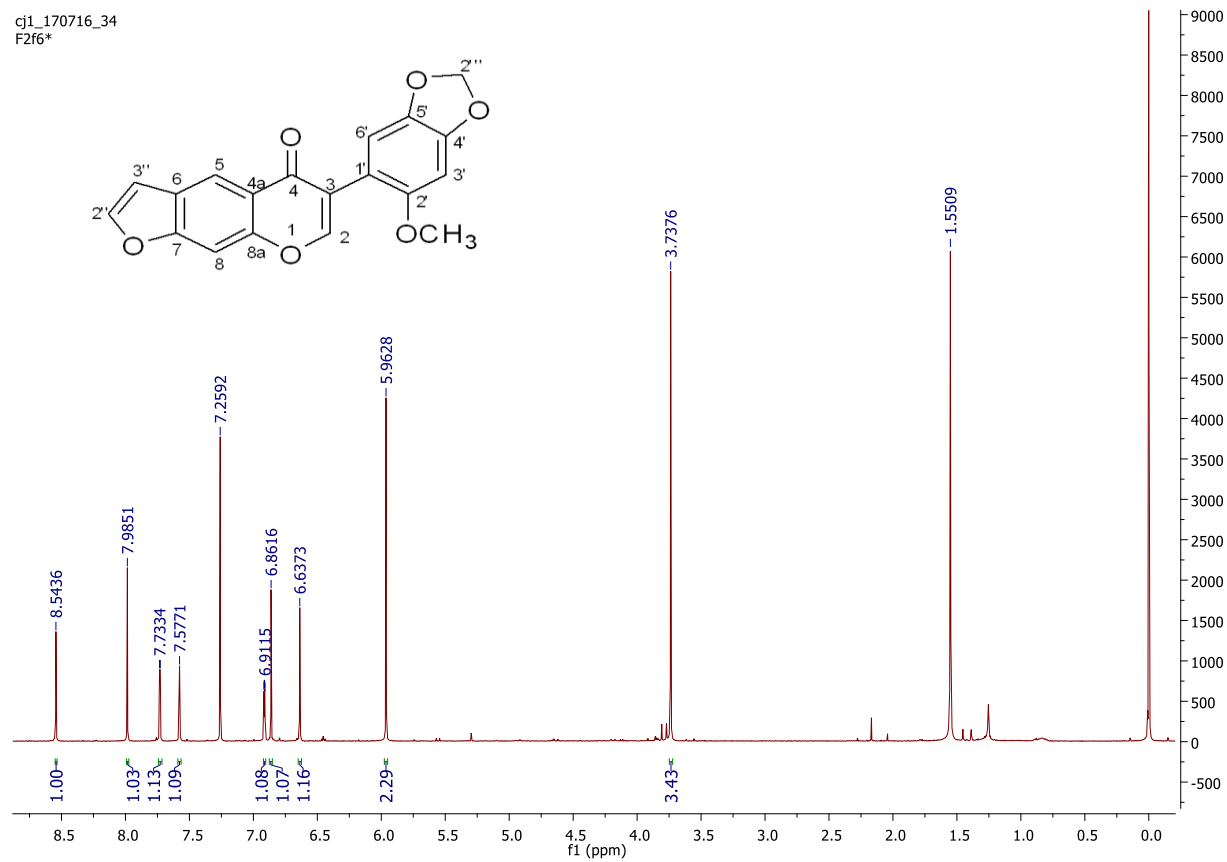

**Figure S17.** <sup>1</sup>H NMR Spectrum Compound **18** (400 MHz, CDCl<sub>3</sub>)

cjd\_180601\_36  
T18-35F8 IN MeOH  
PROTONRO MeOD {C:\Avance\pyne} christiana 36

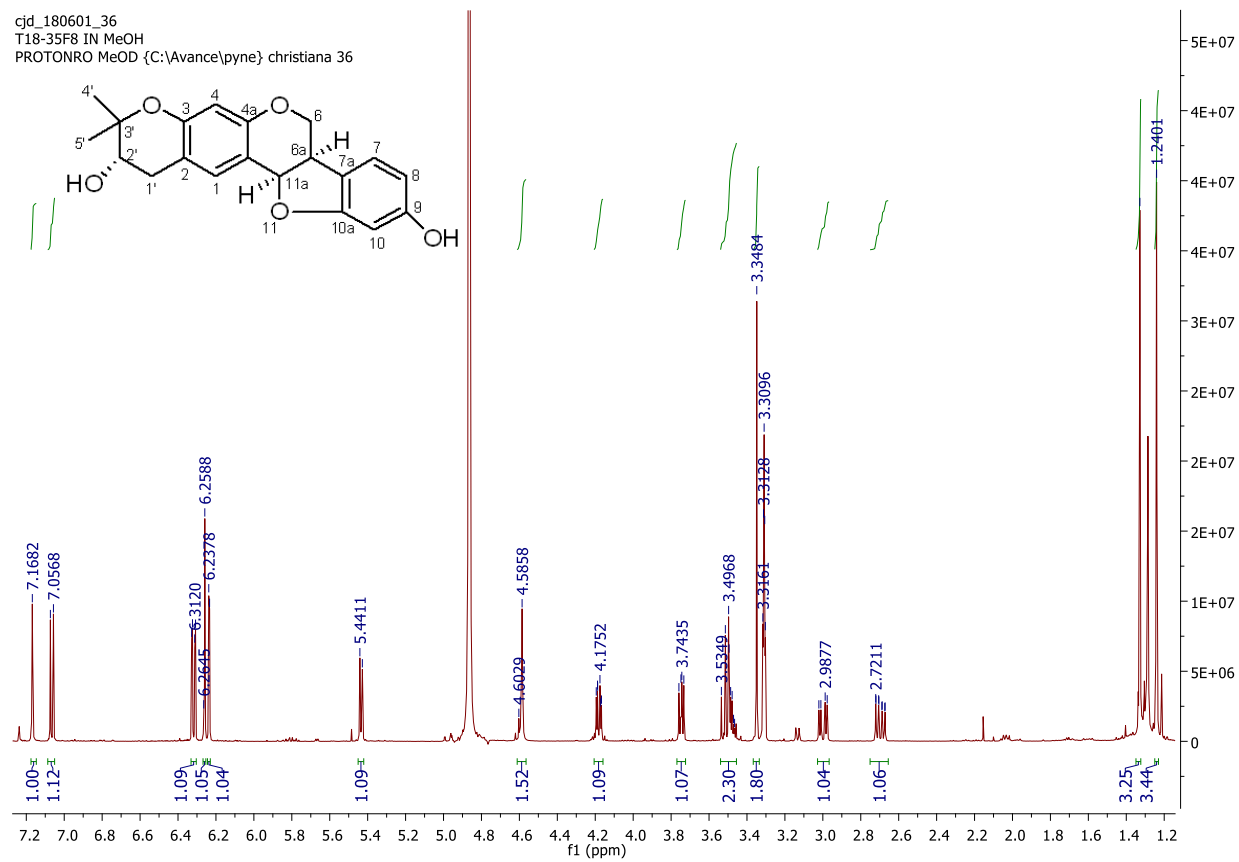

**Figure S18.**  $^1\text{H}$  NMR Spectrum of Compound **19** (500 MHz, MeOD)

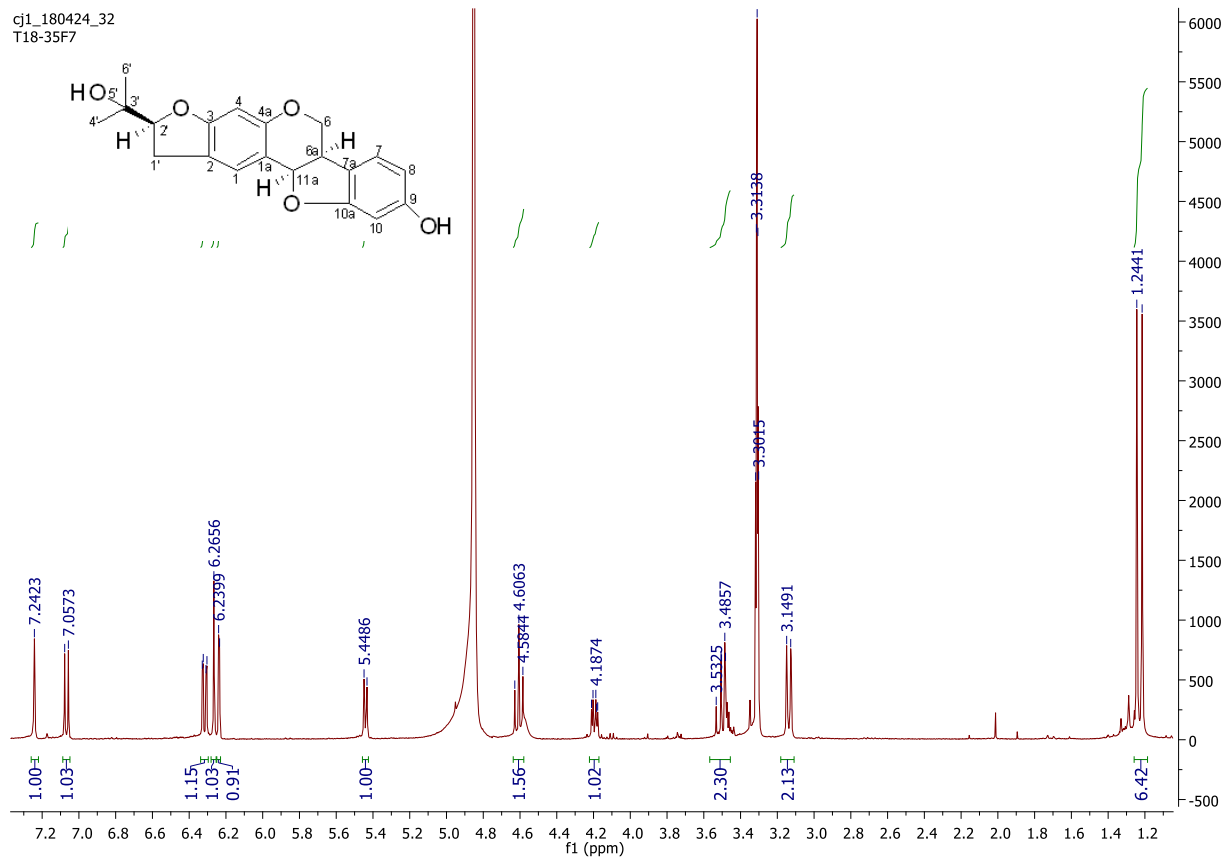

**Figure S19.**  $^1\text{H}$  NMR Spectrum of Compound **20** (500 MHz, MeOD)

**Table S1.** Experimental and Literature  $^1\text{H}$  NMR Data of Compound **1**

| P    | H $\delta$ ( $\text{CDCl}_3$ ) |                         |
|------|--------------------------------|-------------------------|
|      | Expt. (500 MHz)                | Lit. <sup>1</sup> (MHz) |
| 1    | 7.65 (s, 1H)                   | 7.63 (s)                |
| 4    | 7.08 (s, 1H)                   | 7.06 (s)                |
| 6    | 5.54 (s, 2H)                   | 5.51 (s, 2H)            |
| 7    | 6.74 (s, 1H)                   | 6.75 (s)                |
| 8    | -----                          | -----                   |
| 10   | 7.05 (s, 1H)                   | 7.51 (s)                |
| 2''  | 7.53(d, $J = 2.1$ , 1H)        | 7.56 (d, $J = 2.2$ )    |
| 3''  | 6.73(m, 1H)                    | 6.69 (d, $J = 2.2$ )    |
| 2''' | 6.01 (s, 2H)                   | 5.98 (s, 2H)            |

Assignments are made on the basis of COSY, HSQC, HMBC and NOESY correlations, Chemical shift values are in  $\delta$  (ppm), and Coupling constants ( $J$ ) are in Hz. P = Position

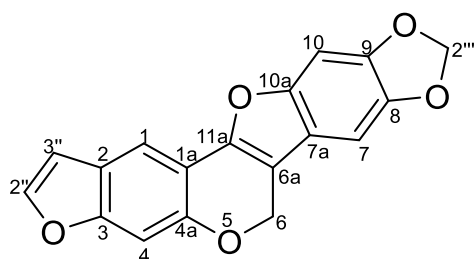**Compound 1 (Neoduleen) Data**

$[\alpha]_{\text{D}}^{21} +12.9^\circ$  (c 0.3 in  $\text{CHCl}_3$ ).  $^1\text{H}$  NMR (500 MHz,  $\text{CDCl}_3$ )  $\delta$  7.65 (s, 1H, H-1), 7.53(d,  $J = 2.1$ , Hz, 1H, H-2''), 7.08 (s, 1H, H-4), 7.05 (s, 1H, H-10), 6.74 (s, 1H, H-7), 6.73(m, 1H, H-3''), 6.01 (s, 2H, H-2'''), 5.54 (s, 2H, H-6).  $^{13}\text{C}$  NMR (126 MHz,  $\text{CDCl}_3$ )  $\delta$  155.4 (C-3), 151.8 (C-4a), 150.6 (C-10a), 147.9 (C-11a), 145.9 (C-8), 144.8 (C-10), 144.7 (C-2''), 121.6 (C-2), 119.0 (C-6a), 113.4 (C-1a), 111.9 (C-1), 108.3 (C-7a), 106.6 (C-3''), 101.5 (C-2'''), 99.9 (C-4), 97.5 (C-7), 94.1 (C-10), 65.3 (C-6).

**Table S2.** Experimental and Literature  $^1\text{H}$  NMR and  $^{13}\text{C}$  NMR Data of Compound **3**

| Position         | Expt. (400 MHz, $\text{CDCl}_3$ ) |                                           | Lit. <sup>2</sup> (500 MHz)    |                                           |
|------------------|-----------------------------------|-------------------------------------------|--------------------------------|-------------------------------------------|
|                  | $^1\text{H}$ NMR                  | $^{13}\text{C}$ NMR                       | $^1\text{H}$ NMR               | $^{13}\text{C}$ NMR                       |
| 1                |                                   | 127.1                                     |                                | 127.1                                     |
| 2                | 7.03 (d, $J = 1.9$ , 1H)          | 114.7                                     | 7.04 (d, $J = 1.8$ , 1H)       | 114.7                                     |
| 3                |                                   | 146.8                                     |                                | 146.8                                     |
| 4                |                                   | 147.9                                     |                                | 147.9                                     |
| 5                | 6.91 (d, $J = 8.1$ , 1H)          | 109.3                                     | 6.92 (d, $J = 8.1$ , 1H)       | 109.3                                     |
| 6                | 7.07 (dd, $J = 8.2$ , 1.9, 1H)    | 123.1                                     | 7.08 (dd, $J = 8.1$ , 1.8, 1H) | 123.1                                     |
| 1'               | 7.61 (d, $J = 15.9$ , 1H)         | 144.6                                     | 7.62 (d, $J = 15.9$ , 1H)      | 144.6                                     |
| 2'               | 6.29 (d, $J = 15.9$ , 1H)         | 115.7                                     | 6.29 (d, $J = 15.9$ , 1H)      | 115.7                                     |
| 3'               |                                   | 167.4                                     |                                | 167.4                                     |
| 5'               | 4.19 (t, $J = 6.7$ , 2H)          | 64.6                                      | 4.20 (t, $J = 6.7$ , 2H)       | 64.6                                      |
| 6'               | 1.74 – 1.65 (m, 2H)               | 29.7                                      | 1.70 quint, $J = 6.8$ , 2H)    | 29.7                                      |
| 7'               | 1.25 (s, 58H, H-7')               | 29.7-22.7 ( $-\text{CH}_2$ ) <sub>n</sub> | 1.25 (s, 58H, H-7')            | 29.7-22.7 ( $-\text{CH}_2$ ) <sub>n</sub> |
| 8'               | 0.88 (t, $J = 6.9$ Hz, 3H)        | 14.1 ( $-\text{CH}_3$ )                   | 0.89 (t, $J = 6.9$ , 3H)       | 14.1 ( $-\text{CH}_3$ )                   |
| OCH <sub>3</sub> | 3.93 (s, 3H)                      | 55.9                                      | 3.94 (s, 3H)                   | 55.9                                      |
| OH               | 5.86 (s, 1H)                      | 146.8                                     | 5.85 (s, 1H)                   | -----                                     |



|  |  |  |  |  |
|--|--|--|--|--|
|  |  |  |  |  |
|--|--|--|--|--|

Assignments are made on the basis of COSY, HSQC, HMBC and NOESY correlations, Chemical shift values are in  $\delta$  (ppm), and Coupling constants ( $J$ ) are in Hz

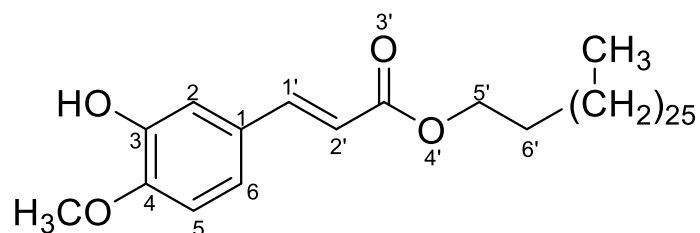

### NMR Data of Compound 3 (Ferulic Acid)

Mp 69-71°C and  $[\alpha]^{21} +18.9^\circ$  ( $c$  0.3 in  $\text{CHCl}_3$ ), Its HRESITOFMS data afforded an  $[\text{M} + \text{Na}]^+$  ion at  $m/z$ , implying a molecular formula of  $\text{C}_{36}\text{H}_{62}\text{O}_4$  (calcd for  $\text{C}_{36}\text{H}_{62}\text{O}_4$ ,  $m/z$  559.4726).

$^1\text{H}$  NMR (400 MHz,  $\text{CDCl}_3$ )  $\delta$  7.61 (d,  $J = 15.9$  Hz, 1H, H-1'), 7.07 (dd,  $J = 8.2, 1.9$  Hz, 1H, H-6), 7.03 (d,  $J = 1.9$  Hz, 1H, H-2), 6.91 (d,  $J = 8.1$  Hz, 1H, H-5), 6.29 (d,  $J = 15.9$  Hz, 1H, H-2'), 4.19 (t,  $J = 6.7$  Hz, 2H, H-5'), 3.93 (s, 3H,  $\text{OCH}_3$ ), 1.74 – 1.65 (m, 2H, H-6'), 1.25 (s, 58H, H-7'), 0.88 (t,  $J = 6.9$  Hz, 3H, 8').

$^{13}\text{C}$  NMR (101 MHz,  $\text{CDCl}_3$ )  $\delta$  167.4 (C-3'), 147.9 (C-4), 146.8 (C-3 OH), 144.6 (C-1'), 127.1 (C-1), 123.1 (C-6), 115.7 (C-2'), 114.7 (C-2), 109.3 (C-5), 64.6 (C-5'), 55.9 ( $\text{OCH}_3$ ), 29.7 (C-6'), 29.7-22.7 ( $-\text{CH}_2$ )<sub>n</sub>, 14.1 ( $-\text{CH}_3$ ).

**Table S3.** Experimental and Literature  $^1\text{H}$  NMR Data of Compound 4

| P                | H $\delta$ (CDCl <sub>3</sub> ) |                           |
|------------------|---------------------------------|---------------------------|
|                  | Expt. (400 MHz)                 | Lit. <sup>3</sup>         |
| 1                | 7.81 (s, 1H)                    | 7.71 (s)                  |
| 4                | 7.09 (s, 1H)                    | 7.03 (s)                  |
| 6                | 4.33–4.27 (m)                   | 4.22 (m)                  |
|                  | 3.73 (t, $J$ = 10.7 1H)         | 3.72 (m)                  |
| 7                | 6.91 (dd, $J$ = 8.2, 0.6 1H)    | 6.84 (d)                  |
| 8                | 6.48 (d, $J$ = 8.2, 1H)         | 6.41 (d)                  |
| 10               | -----                           | -----                     |
| 2''              | 7.56(d, $J$ = 2.2, 1H)          | 7.50 (d, $J$ = 2.5)       |
| 3''              | 6.73(dd, $J$ = 2.2, 1.0 1H)     | 6.63 (dd, $J$ = 2.5, 1.0) |
| 2'''             | -----                           | -----                     |
|                  | -----                           | -----                     |
| 6a               | 3.65 (dd, $J$ = 6.2, 4.8 1H)    | 3.53 (m)                  |
| 11a              | 5.72 (d, $J$ = 6.9 1H)          | 5.69 (d)                  |
| OCH <sub>3</sub> | 3.95 (s, 3H)                    | 3.91 (s)                  |
|                  | 3.85 (s, 3H)                    | 3.81 (s)                  |

Assignments are made on the basis of COSY, HSQC, HMBC and NOESY correlations, Chemical shift values are in  $\delta$  (ppm), and Coupling constants ( $J$ ) are in Hz. P = Position

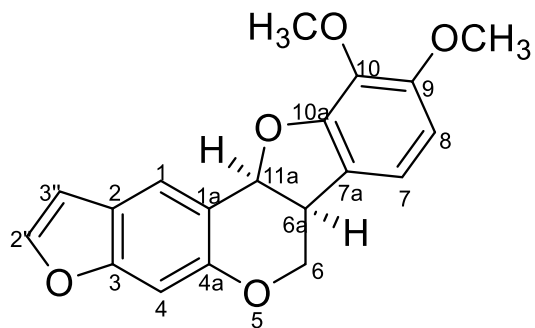

**Compound 4 (Ambonane) Data**

$[\alpha]^{25}_{-192^{\circ}}$  (*c* 0.05 in  $\text{CHCl}_3$ ) [Lit.<sup>3</sup>  $[\alpha]_{\text{D}}^{-214^{\circ}}$  (*c* 0.01 in  $\text{CHCl}_3$ )], Its HRESITOFMS data afforded an  $[\text{M}+\text{H}]^{+}$  ion at  $m/z$  325.1076, implying a molecular formula of  $\text{C}_{19}\text{H}_{16}\text{O}_5$  (calcd for  $\text{C}_{19}\text{H}_{16}\text{O}_5$ ,  $m/z$  325.1076).  $^1\text{H}$  NMR (400 MHz,  $\text{CDCl}_3$ )  $\delta$  7.81 (s, 1H, H-1), 7.56 (d,  $J = 2.2$  Hz, 1H, H-2''), 7.09 (s, 1H, H-4), 6.91 (dd,  $J = 8.1, 0.6$  Hz, 1H, H-7), 6.73 (dd,  $J = 2.2, 1.0$  Hz, 1H, H-3''), 6.48 (d,  $J = 8.2$  Hz, 1H, H-8), 5.72 (d,  $J = 6.9$  Hz, 1H, H-11a), 4.33 – 4.27 (m, 1H, H-6), 3.95 (s, 3H,  $\text{OCH}_3$ -9), 3.85 (s, 3H,  $\text{OCH}_3$ -10), 3.73 (t,  $J = 10.7$  Hz, 1H, H-6), 3.65 (dd,  $J = 6.2, 4.8$  Hz, 1H, H-6a).  $^{13}\text{C}$  NMR (126 MHz,  $\text{CDCl}_3$ )  $\delta$  155.7 (C-3), 153.5 (C-4a), 153.1 (C-9), 151.2 (C-10), 145.1 (2''), 145. (C-10a), 123.3 (C-7a), 122.3 (C-1), 121.7 (C-2), 118.1 (C-7), 116.4 (C-1a), 106.3 (C-3''), 104.8 (C-8), 99.7 (C-4), 79.7 (C-11a), 77.27, 77.01, 76.76, 66.9 (C-6), 60.7 ( $\text{OCH}_3$ ), 56.4 ( $\text{OCH}_3$ ), 40.1 (C-6a).

**Table S4.** Experimental and Literature  $^1\text{H}$  NMR Data of Compound **12**

|                                                           | P              | H $\delta$ ( $\text{CDCl}_3$ )         |                   |
|-----------------------------------------------------------|----------------|----------------------------------------|-------------------|
|                                                           |                | Expt. (400MHz)                         | Lit. <sup>4</sup> |
| made<br><br><br><br><br><br><br><br><br><br>are in<br>(J) | 2              | 4.64 (dd, $J = 11.9, 11, 1\text{H}$ )  | 4.50 (dd)         |
|                                                           |                | 4.52 (dd, $J = 11.0, 5.5, 1\text{H}$ ) | 4.50 (dd)         |
|                                                           | 3              | 4.24 (dd, $J = 11.9, 5.5, 1\text{H}$ ) | 4.50 (dd)         |
|                                                           | 5              | 8.27 (s, 1H)                           | 8.23 (s)          |
|                                                           | 8              | 7.06 (s, 1H)                           | 7.07 (s)          |
|                                                           | 3'             | -----                                  | -----             |
|                                                           | 5'             | 6.84 (d, $J = 8.5, 1\text{H}$ )        | 6.83 (d)          |
|                                                           | 6'             | 6.65 (d, $J = 8.5, 1\text{H}$ )        | 6.75 (d)          |
|                                                           | 2''            | 7.59 (d, $J = 2.3, 1\text{H}$ )        | 7.56 (d)          |
|                                                           | 3''            | 6.77 (dd, $J = 2.3, 1.0\text{H}$ )     | 6.70 (d)          |
|                                                           | 2'''           | -----                                  | -----             |
|                                                           | $\text{OCH}_3$ | 3.87 (s, 3H)                           | 3.90 (s)          |
|                                                           |                | 3.86 (s, 3H)                           | 3.88 (s)          |
|                                                           |                | 3.85 (s, 3H)                           | 3.87 (s)          |

Assignments are on the basis of COSY, HSQC, HMBC and NOESY correlations, Chemical shift values  $\delta$  (ppm), and Coupling constants are in Hz

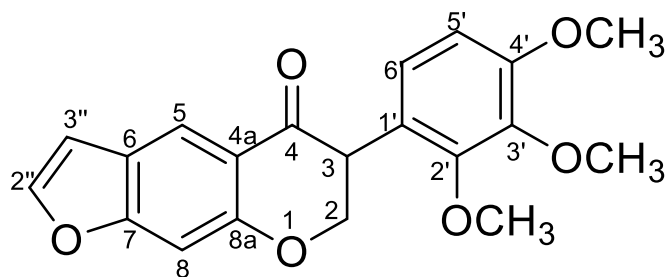

#### Compound 12 (Nepseudin) Data

$[\alpha]^{24}_{-102.2^\circ}$  (*c* 0.8 in  $\text{CHCl}_3$ ), [Lit.<sup>4</sup>  $[\alpha]^{20}_0$  ( $\text{CHCl}_3$ )] Its HRESITOFMS data afforded an  $[\text{M} + \text{H}]^+$  ion at  $m/z$  355.1182, implying a molecular formula of  $\text{C}_{20}\text{H}_{18}\text{O}_6$  (calcd for  $\text{C}_{18}\text{H}_{17}\text{O}_6$ ,  $m/z$  355.1182).  $^1\text{H}$  NMR (500 MHz,  $\text{CDCl}_3$ )  $\delta$  8.27 (s, 1H, H-5), 7.59 (d,  $J = 2.3$  Hz, 1H, H-2''), 7.06 (s, 1H, H-8), 6.84 (d,  $J = 8.5$  Hz, 1H, H-5'), 6.77 (dd,  $J = 2.3, 1.0$  Hz, 1H, H-3''), 6.65 (d,  $J = 8.5$  Hz, 1H, H-6'), 4.64 (dd,  $J = 11.8, 11.1$  Hz, 1H, H-2), 4.52 (dd,  $J = 11.0, 5.5$  Hz, 1H, H-2), 4.24 (dd,  $J = 11.9, 5.5$  Hz, 1H, H-3), 3.87 (s, 3H,  $\text{OCH}_3$ ), 3.86 (s, 3H,  $\text{OCH}_3$ ), 3.85 (s, 3H,  $\text{OCH}_3$ ).  $^{13}\text{C}$  NMR (101 MHz,  $\text{CDCl}_3$ )  $\delta$  192.9 (C-4), 159.9 (C-8a), 159.3 (C-7), 153.7 (C-3'), 152.0 (C-2'), 146.0 (C-2''), 142.3 (C-4'), 124.5 (C-5'), 122.7 (C-6), 121.5 (C-1'), 120.9 (C-5), 118.8 (C-4a), 107.4 (C-6'), 107.1 (C-3''), 99.7 (C-8), 71.6 (C-2), 60.7 ( $\text{OCH}_3$ ), 60.7 ( $\text{OCH}_3$ ), 56.0 ( $\text{OCH}_3$ ), 49.0 (C-3).

**Table S5.** Experimental and Literature  $^1\text{H}$  NMR Data of Compound **13**

| P | H $\delta$ ( $\text{CD}_3\text{OD}$ ) |
|---|---------------------------------------|
|   |                                       |

the  
shift  
and  
are in

|      | Expt. (400MHz)                 | Lit. <sup>5, 6</sup> |
|------|--------------------------------|----------------------|
| 1    | 7.11 (s, 1H)                   | 7.16(s)              |
| 2    | -----                          | -----                |
|      | -----                          | -----                |
| 3    | -----                          | -----                |
| 4    | 6.26 (s, 1H)                   | 6.42 (s)             |
| 5    | -----                          | -----                |
| 6    | 4.22 (dd, $J = 9.7, 3.6, 1H$ ) | 4.22 (m)             |
|      | 3.51 (dd, $J = 7.2, 5.7, 1H$ ) | 3.62 (m)             |
| 7    | 7.07 (d, $J = 8.0, 1H$ )       | 7.06 (d)             |
| 8    | 6.33 (dd, $J = 8.0, 2.1, 1H$ ) | 6.36 (d)             |
| 10   | 6.29 (d, $J = 2.1, 1H$ )       | 6.40 (d)             |
| 11a  | 5.42 (d, $J = 6.3, 1H$ )       | 5.49 (d)             |
| 2'   | -----                          | -----                |
| 3'   | 5.61 (d, $J = 9.8, 1H$ )       | 5.56 (d)             |
| 4'   | 6.37 (d, $J = 9.8, 1H$ )       | 6.33 (d)             |
| 5'   | -----                          | -----                |
| 2''  | 1.39 (s, 3H)                   | 1.41 (s, 3H)         |
| 3''  | 1.40 (s, 3H)                   | 1.43 (s, 3H)         |
| 4''  |                                |                      |
| 6a   | 3.36 – 3.27 (m, 1H)            | 3.52(m)              |
| 4''' | -----                          | -----                |
| 5''' | -----                          | -----                |
| OH   | 2.78 (s)                       | -----                |

Assignments are made on basis of COSY, HSQC, HMBC and NOESY correlations, Chemical values are in  $\delta$  (ppm), Coupling constants ( $J$ ) Hz. P = Position

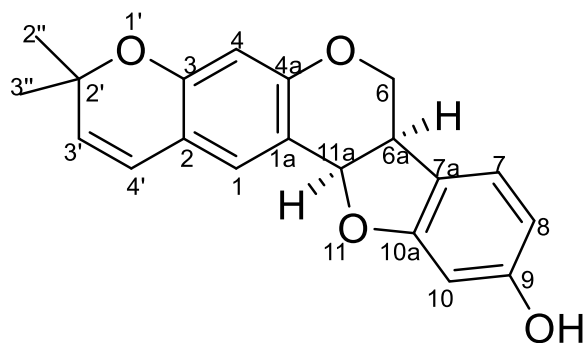

### Compound 13 (Neorautenol) Data

Mp 172-174 °C, (Lit.<sup>1,5</sup> 93-95 °C)  $[\alpha]^{21}_{\text{D}} -127.2^{\circ}$  (*c* 0.2 in CHCl<sub>3</sub>) [Lit.<sup>1,5</sup>  $[\alpha]_{\text{D}} -273^{\circ}$  (*c* 0.08 in CHCl<sub>3</sub>)]. Its HRESITOFMS data afforded an  $[M + H]^+$  ion at  $m/z$  323.1283, implying a molecular formula of C<sub>20</sub>H<sub>18</sub>O<sub>4</sub> (calcd for C<sub>20</sub>H<sub>18</sub>O<sub>4</sub>,  $m/z$  323.1283). <sup>1</sup>H NMR (400 MHz, MeOD)  $\delta$  7.11 (s, 1H, H-1), 7.07 (d, *J* = 8.0 Hz, 1H, H-7), 6.37 (d, *J* = 9.8 Hz, 1H, H-4'), 6.33 (dd, *J* = 8.0, 2.1 Hz, 1H, H-8), 6.29 (d, *J* = 2.1 Hz, 1H, H-10) 6.26 (s, 1H, H-4), 5.61 (d, *J* = 9.8 Hz, 1H, H-3'), 5.42 (d, *J* = 6.3 Hz, 1H, H-11a), 4.22 (dd, *J* = 9.7, 3.6 Hz, 1H, H-6), 3.51 (dd, *J* = 7.2, 5.7 Hz, 1H, H-6), 3.36 – 3.27 (m, 1H, H-6a), 1.40 (s, 3H, H-3''), 1.39 (s, 3H, H-2''). <sup>13</sup>C NMR (101 MHz, MeOD)  $\delta$  161.9 (C-10a), 159.8 (C-9), 157.8 (C-3), 155.7 (C-4a), 130.2 (C-3'), 129.8 (C-1), 125.9 (C-7), 122.7 (C-4'), 119.4 (C-7a), 117.5 (C-1a), 114.2 (C-2), 108.7 (C-8), 105.3 (C-4), 98.8 (C-10), 79.7 (C-2'), 77.6 (C-11a), 67.7 (C-6), 40.9 (C-6a), 28.4 (3''), 28.2 (2'').

**Table S6.** Experimental and Literature <sup>1</sup>H NMR Data of Compounds **11** and **15**

| P                | H δ 11 (CDCl <sub>3</sub> )         |                   | H δ 15 (Acetone)             |                   |
|------------------|-------------------------------------|-------------------|------------------------------|-------------------|
|                  | Expt. (500 MHz)                     | Lit. <sup>7</sup> | Expt. (400 MHz)              | Lit. <sup>8</sup> |
| 1                | 7.21 (s, 1H)                        | 7.25(s)           | 6.89 (s, 1H)                 | 7.01 (s)          |
| 4                | 6.44 (s, 1H)                        | 6.47(s)           | 6.40 (s, 1H )                | 6.44 (s)          |
| 6                | 4.19 (dd, = 11.0, 5.0, 1H)          | 4.18              | 4.27 – 4.23 (m)              | 4.22 (m)          |
|                  | 3.61 (t, <i>J</i> = 11.0, 1H)       | 3.62              | 3.65 – 3.58 (m)              | 3.65 (m)          |
| 7                | 6.71 (s, 1H)                        | 6.73(s)           | 6.90 (s, 1H)                 | 6.70 (s)          |
| 10               | 6.39 (s, 1H)                        | 6.42(s)           | 6.47 (s, 1H)                 | 6.42 (s)          |
| 1'               | 3.32 (d, <i>J</i> = 7.2, 2H)        | 3.27-3.38 (d)     | -----                        | -----             |
| 2'               | 5.34 – 5.29 (m, 1H)                 | 5.45-5.22 (m)     | -----                        | -----             |
| 4'               | 1.81 (S, 3H)                        | 1.77(s)           | -----                        | -----             |
|                  | 1.76 (S,3H)                         |                   |                              |                   |
| 5'               |                                     | 1.71(s)           | -----                        | -----             |
|                  | 5.88, 5.91, (d, <i>J</i> = 1.4, 2H) |                   |                              |                   |
| 2''              |                                     | 5.92              | 5.92 (d, <i>J</i> = 1.0, 2H) | 5.90 (d, 2H)      |
|                  | 3.44 (s, 1H)                        |                   |                              |                   |
| 6a               |                                     | 3.47(s)           | 3.71 – 3.47 (m, 1H)          | 3. 45 (m)         |
|                  | 5.45 (d, <i>J</i> = 6.9, 1H)        |                   |                              |                   |
| 11a              |                                     | 5.46              | 5.47 (d, <i>J</i> = 6.9, 1H) | 5.43              |
|                  | -----                               |                   |                              |                   |
| OCH <sub>3</sub> |                                     | -----             | 3.82 (s, 3H)                 | 3.87(s)           |
| OH               | 5.37 (d, <i>J</i> = 4.4, 1H)        | 5.45              | 5.62 (s)                     | 5.28 (s)          |

Assignments are made on the basis of COSY, HSQC, HMBC and NOESY correlations, Chemical shift values are in δ (ppm), and Coupling constants (*J*) are in Hz. P = Position

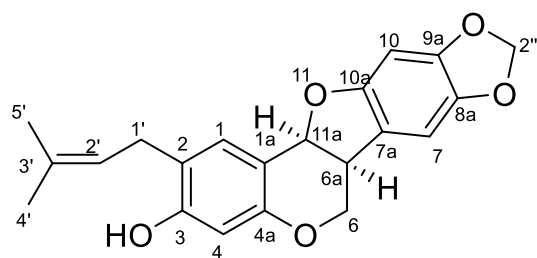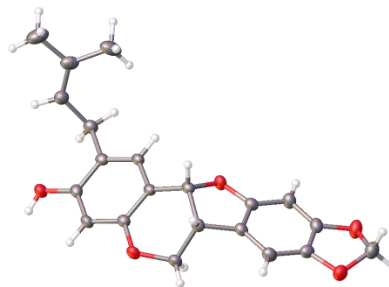

### NMR Data of Compound 11 ((-)-2-isopentenyl-3-hydroxy-8-9-methylenedioxypterocarpan)

Mp 149-152 °C (Lit.<sup>7</sup> 146-147 °C),  $[\alpha]^{23}_{\text{D}} -339.5^\circ$  (*c* 0.1 in CHCl<sub>3</sub>) [Lit.<sup>7</sup>  $[\alpha]^{23}_{\text{D}} -261.9^\circ$  (*c* 0.8 in CHCl<sub>3</sub>)], Its HRESITOFMS data afforded an  $[M-H]^+$  ion at  $m/z$  353.2661, implying a molecular formula of C<sub>21</sub>H<sub>20</sub>O<sub>5</sub> (calcd for C<sub>18</sub>H<sub>17</sub>O<sub>6</sub>,  $m/z$  353.2661). <sup>1</sup>H NMR (500 MHz, CDCl<sub>3</sub>)  $\delta$  7.21 (s, 1H, H-1), 6.71 (s, 1H, H-7), 6.44 (s, 1H, H-4), 6.39 (s, 1H, H-10), 5.91 (d, *J* = 1.4 Hz, 1H, H-2''), 5.88 (d, *J* = 1.4 Hz, 1H, H-2''), 5.45 (d, *J* = 6.9 Hz, 1H, H-11a), 5.37 (d, *J* = 4.4 Hz, 1H, OH), 5.34 – 5.29 (m, 1H, H-2'), 4.19 (dd, *J* = 11.0, 5.0 Hz, 1H, H-6), 3.61 (t, *J* = 11.0 Hz, 1H, H-6), 3.44 (s, 1H, H-6a), 3.32 (d, *J* = 7.2 Hz, 2H, H-1'), 1.81 – 1.76 (s, 6H, H-4',5'). <sup>13</sup>C NMR (126 MHz, CDCl<sub>3</sub>)  $\delta$  155.8 (C-3), 154.9 (C-4a), 154.2 (C-10a), 148.1 (C-9a), 141.7 (C-8a), 134.8 (C-3'), 131.8 (C-1), 121.9 (C-2'), 121.2 (C-3), 118.1 (C-7a), 112.2 (C-1a), 104.8 (C-7), 103.9 (C-4), 101.3 (C-2''), 93.8 (C-10), 78.6 (C-11a), 77.28, 77.03, 76.77, 66.5 (C-6), 40.2 (C-6a), 29.2 (1'), 25.8 (C-5'), 17.9 (C-4').

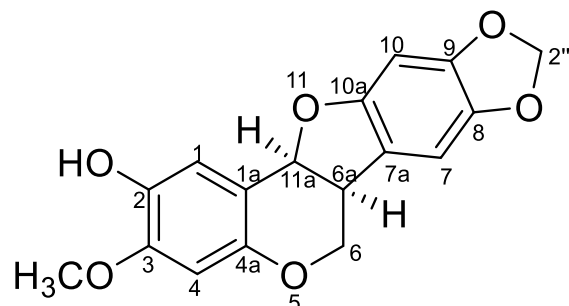

### Compound 15 ((-)-2-hydroxypterocarpan) Data

Mp 223-225 °C (Lit.<sup>8</sup> 238-239 °C)  $[\alpha]^{23}_{\text{D}} -107.4^\circ$  (*c* 0.3 in CHCl<sub>3</sub>) [Lit.<sup>8</sup>  $[\alpha]^{23}_{\text{D}} -227.7^\circ$  (*c* 0.8 in CHCl<sub>3</sub>)], Its HRESITOFMS data afforded an  $[M+H]^+$  ion at  $m/z$  315.0869, implying a molecular formula of C<sub>17</sub>H<sub>14</sub>O<sub>6</sub> (calcd for C<sub>17</sub>H<sub>14</sub>O<sub>6</sub>,  $m/z$  315.0869). <sup>1</sup>H NMR (400 MHz, Acetone)  $\delta$  6.90 (s, 1H, H-7), 6.89 (s, 1H, H-1), 6.47 (s, 1H, H-10), 6.40 (s, 1H, H-4), 5.93 (d, *J* = 1.0 Hz, 1H, H-2''), 5.91 (d, *J* = 1.0 Hz, 1H, H-2''), 5.62 (s, OH), 5.47 (d, *J* = 6.9 Hz, 1H, H-11a), 4.27 – 4.23 (m, 1H, H-6), 3.82 (s, 3H, OCH<sub>3</sub>), 3.65 – 3.58 (m, 1H, H-6), 3.71 – 3.47 (m, 1H, H-6a). <sup>13</sup>C NMR (101 MHz, Acetone)  $\delta$  154.4 (C-10a), 149.1 (C-4a), 147.9 (C-9), 141.6 (C-8), 143.3 (C-3), 141.3 (C-2), 118.6 (C-7a), 115.7 (C-1), 112.1 (C-1a), 104.9 (C-7), 101.2 (C-2''), 100.4 (C-4), 93.1 (C-10), 78.5 (C-11a), 66.3 (C-6), 55.3 (OCH<sub>3</sub>).



**Table S7.** Experimental and Literature  $^{13}\text{C}$  NMR Data of Compounds **19** and **20**

| Position | H $\delta$ 19 ( $\text{CD}_3\text{OD}$ ) | ( $\text{CD}_3\text{OD}$ ) | H $\delta$ 20 ( $\text{CD}_3\text{OD}$ ) | $\text{CD}_3\text{OD}$ |
|----------|------------------------------------------|----------------------------|------------------------------------------|------------------------|
|          | Expt.                                    | Lit. <sup>9</sup>          | Expt.                                    | Lit. <sup>9</sup>      |
| 1        | 131.8                                    | 133.3                      | 126.3                                    | 127.7                  |
| 2        | 113.9                                    | 115.4                      | 121.1                                    | 122.5                  |
| 3        | 154.1                                    | 155.6                      | 161.3                                    | 162.7                  |
| 4        | 103.8                                    | 105.3                      | 97.2                                     | 98.6                   |
| 6        | 66.3                                     | 67.7                       | 66.4                                     | 67.8                   |
| 7        | 124.6                                    | 126.0                      | 124.6                                    | 126.0                  |
| 8        | 107.3                                    | 108.7                      | 107.3                                    | 108.7                  |
| 9        | 160.5                                    | 159.9                      | 160.5                                    | 158.8                  |
| 10       | 97.3                                     | 98.8                       | 97.3                                     | 98.8                   |

|     |       |       |       |       |
|-----|-------|-------|-------|-------|
| 1a  | 112.9 | 114.4 | 112.1 | 113.6 |
| 4a  | 154.9 | 156.4 | 155.9 | 157.4 |
| 6a  | 39.6  | 41.1  | 39.5  | 40.9  |
| 7a  | 118.1 | 119.5 | 118.2 | 119.0 |
| 10a | 158.4 | 162.0 | 158.4 | 162.0 |
| 11a | 78.5  | 79.9  | 78.9  | 80.4  |
| 1'  | 30.1  | 31.6  | 29.3  | 30.8  |
| 2'  | 77.0  | 70.6  | 89.9  | 91.4  |
| 3'  | 69.2  | 78.4  | 71.2  | 72.5  |
| 4'  | 19.6  | 21.0  | 23.7  | 25.2  |
| 5'  | 24.5  | 26.0  |       |       |
| 6'  |       |       | 23.9  | 25.4  |

**Table S8.** Experimental and Literature  $^{13}\text{C}$  NMR Data of Compounds **2**, **6**, **7**, **9** and **10**

| P    | H $\delta$ 2 (CDCl <sub>3</sub> ) |                    | H $\delta$ 6 (CDCl <sub>3</sub> ) |                    | H $\delta$ 7 (CDCl <sub>3</sub> ) |                    | H $\delta$ 9 (CDCl <sub>3</sub> ) |                    | H $\delta$ 10 (CDCl <sub>3</sub> ) |                    |
|------|-----------------------------------|--------------------|-----------------------------------|--------------------|-----------------------------------|--------------------|-----------------------------------|--------------------|------------------------------------|--------------------|
|      | Expt.                             | Lit. <sup>10</sup> | Expt.                              | Lit. <sup>10</sup> |
| 1    | 122.8                             | 122.9              | -----                             | -----              | -----                             | -----              | 106.8                             | 106.8              | 106.9                              | 106.9              |
| 2    | 122.4                             | 122.4              | 160.1                             | 173.2              | 71.3                              | 71.3               | 142.3                             | 142.3              | 142.4                              | 143.2              |
| 3    | 155.7                             | 155.7              | 123.9                             | 124.0              | 48.33                             | 48.3               | 149.5                             | 149.5              | 147.4                              | 147.9              |
| 4    | 99.9                              | 99.9               | 142.4                             | 142.4              | 192.7                             | 192.6              | 99.2                              | 99.9               | 98.9                               | 98.9               |
| 5    | -----                             | -----              | 119.6                             | 119.6              | 120.9                             | 120.8              | -----                             | -----              | -----                              | -----              |
| 6    | 66.9                              | 67.0               | 124.8                             | 124.8              | 115.5                             | 115.6              | 63.9                              | 63.9               | 66.4                               | 66.4               |
| 7    | 104.7                             | 104.7              | 156.2                             | 156.2              | 159.2                             | 159.2              | -----                             | -----              | -----                              | -----              |
| 8    | 141.8                             | 141.8              | 99.5                              | 99.5               | 99.7                              | 99.6               | 100.0                             | 100.0              | 99.9                               | 99.8               |
| 9    | 148.2                             | 148.2              | -----                             | -----              | -----                             | -----              | 158.3                             | 158.3              | 158.6                              | 158.6              |
| 10   | 93.8                              | 93.8               | -----                             | -----              | -----                             | -----              | 123.3                             | 123.3              | 123.1                              | 123.1              |
| 11   | -----                             | -----              | -----                             | -----              | -----                             | -----              | 121.0                             | 121.0              | 121.0                              | 121.0              |
| 12   | -----                             | -----              | -----                             | -----              | -----                             | -----              | 192.9                             | 192.9              | 190.6                              | 190.6              |
| 1'   | -----                             | -----              | 122.9                             | 151.7              | 122.6                             | 122.6              | -----                             | -----              | -----                              | -----              |
| 2'   | -----                             | -----              | 151.6                             | 95.5               | 152.7                             | 152.8              | -----                             | -----              | -----                              | -----              |
| 3'   | -----                             | -----              | 95.5                              | 148.8              | 95.4                              | 95.4               | -----                             | -----              | -----                              | -----              |
| 4'   | -----                             | -----              | 148.7                             | 141.3              | 147.8                             | 147.8              | -----                             | -----              | -----                              | -----              |
| 5'   | -----                             | -----              | 141.1                             | 110.3              | 141.3                             | 141.4              | -----                             | -----              | -----                              | -----              |
| 6'   | -----                             | -----              | 110.3                             | -----              | 109.8                             | 109.8              | -----                             | -----              | -----                              | -----              |
| 7'   | -----                             | 145.1              | -----                             | 146.7              | -----                             | -----              | -----                             | -----              | 146.2                              | 146.2              |
| 8'   | -----                             | 106.3              | -----                             | 106.4              | -----                             | -----              | 146.4                             | 146.4              | 106.9                              | 106.9              |
| 2''  | 145.1                             | 116.5              | 146.7                             | 101.5              | 146.0                             | 107.0              | 146.5                             | 101.3              | 146.2                              | 101.2              |
| 3''  | 106.2                             | 153.5              | 106.4                             | 116.2              | 107.1                             | 101.3              | 105.7                             | 109.2              | 106.9                              | 105.3              |
| 2''' | 101.3                             | 40.6               | 101.5                             | -----              | 101.3                             | -----              | 101.3                             | 149.6              | 101.2                              | 148.5              |
|      |                                   |                    | -----                             | -----              |                                   |                    | 109.2                             |                    | 105.3                              | 72.1               |

|                  |       |       |       |        |       |        |       |       |       |       |
|------------------|-------|-------|-------|--------|-------|--------|-------|-------|-------|-------|
| 1a               | 116.5 | 117.9 | 116.2 | 156.2- | ----- | 118.8- | 149.6 | 75.9  | 148.5 | 159.8 |
| 4a               | 153.5 | ----- | ----- | -----  | 118.8 | -----  | 75.9  | 160.3 | 72.1  | ----- |
| 6a               | 40.6  | 154.2 | ----- | -----  | ----- | 159.9  | 160.3 | ----- | 159.8 | ----- |
| 7a               | 117.9 | 79.2  | 157.8 | 56.9   | ----- | -----  | ----- | ----- | ----- | 116.1 |
| 8a               | ----- | ----- | ----- |        | 159.9 | -----  | ----- | 114.6 | ----- | 45.3  |
| 10a              | 154.2 | ----- | ----- |        | ----- | 56.5   | 114.6 | 68.3  | 116.1 | ----- |
| 11a              | 79.2  |       | ----- |        | ----- |        | 68.3  | ----- | 45.3  |       |
| 12a              | ----- |       | 56.9  |        | ----- |        | ----- |       | ----- |       |
| OCH <sub>3</sub> | ----- |       |       |        | 56.5  |        |       |       |       |       |

**Table S9.** Experimental and Literature  $^{13}\text{C}$  NMR Data of Compounds **14**, **16**, **17**, and **18**

| <b>P</b> | <b>H <math>\delta</math> 14 (CDCl<sub>3</sub>)</b> | <b>H <math>\delta</math> 16 (CDCl<sub>3</sub>)</b> | <b>H <math>\delta</math> 17 (CDCl<sub>3</sub>)</b> | <b>H <math>\delta</math> 18 (CDCl<sub>3</sub>)</b> |
|----------|----------------------------------------------------|----------------------------------------------------|----------------------------------------------------|----------------------------------------------------|
|----------|----------------------------------------------------|----------------------------------------------------|----------------------------------------------------|----------------------------------------------------|

|      | Expt. | Lit. <sup>11</sup> | Expt. | Lit. <sup>12, 13</sup> | Expt. | Lit. <sup>10, 12</sup> | Expt. | Lit. <sup>10</sup> |
|------|-------|--------------------|-------|------------------------|-------|------------------------|-------|--------------------|
| 1    | ----- | -----              | 108.7 | 108.8                  | 110.4 | 110.1                  | ----- | -----              |
| 2    | 66.5  | 66.5               | 142.9 | 142.9                  | 157.9 | 157.4                  | 154.7 | 154.7              |
| 3    | 39.4  | 39.4               | 151.1 | 151.2                  | 167.4 | 166.8                  | 121.1 | 121.1              |
| 4    | 78.3  | 76.5               | 101.0 | 101.1                  | 100.9 | 100.6                  | 176.6 | 176.6              |
| 5    | 132.3 | 132.2              | ----- | -----                  | ----- | -----                  | 119.0 | 119.0              |
| 6    | 109.7 | 109.8              | 63.8  | 63.9                   | 66.3  | 65.9                   | 126.0 | 126.0              |
| 7    | 160.2 | 160.2              | ----- | -----                  | ----- | -----                  | 157.3 | 157.2              |
| 8    | 103.6 | 103.7              | 113.2 | 113.2                  | 112.9 | 112.9                  | 99.8  | 99.8               |
| 9    | 156.7 | 157.2              | 168.1 | 168.0                  | 149.5 | 149.0                  | ----- | -----              |
| 10   | 112.6 | 112.4              | 105.3 | 105.3                  | 104.9 | 104.4                  | ----- | -----              |
| 11   | ----- | -----              | 130.1 | 130.2                  | 130.0 | 129.4                  | ----- | -----              |
| 12   | ----- | -----              | 191.1 | 191.1                  | 188.9 | 188.3                  | ----- | -----              |
| 1'   | 122.1 | 119.4              | ----- | -----                  | ----- | -----                  | 112.9 | 112.8              |
| 2'   | 114.8 | 122.0              | ----- | -----                  | ----- | -----                  | 153.0 | 153.0              |
| 3'   | 154.5 | 114.9              | ----- | -----                  | ----- | -----                  | 95.5  | 95.5               |
| 4'   | 99.4  | 156.6              | 31.1  | 31.1                   | 31.3  | 30.9                   | 148.5 | 148.4              |
| 5'   | 156.9 | 99.4               | 87.9  | 88.0                   | 87.9  | 87.3                   | 141.3 | 141.2              |
| 6'   | ----- | 154.4              | 144.0 | 142.9                  | 143.1 | 142.1                  | 111.3 | 113.3              |
| 7'   | ----- | -----              | 112.7 | 112.6                  | 112.6 | 112.5                  | ----- | -----              |
| 8'   | 76.8  | -----              | 17.1  | 17.1                   | 17.1  | 16.7                   | ----- | -----              |
| 2''  | 127.6 | 78.4               | ----- | -----                  | ----- | -----                  | 147.4 | 147.4              |
| 3''  | ----- | 127.6              | ----- | -----                  | ----- | -----                  | 107.1 | 107.0              |
| 2''' | 121.9 | -----              | ----- | -----                  | ----- | -----                  | 101.4 | 101.4              |
| 4''  | 28.0  | 122.1              | 109.3 | 109.5                  | 104.8 | 104.5                  | ----- | -----              |

|                  |      |       |       |       |       |       |       |       |
|------------------|------|-------|-------|-------|-------|-------|-------|-------|
| 4a               | 27.8 | ----- | 148.4 | 148.4 | 143.9 | 143.4 | 121.2 | 121.1 |
| 4'''             |      | ----- | 76.0  | 76.1  | 72.2  | 71.8  | ----- | ----- |
| 5'''             |      | 26.9  | 157.7 | 157.7 | 147.4 | 147.0 | ----- | ----- |
| 8a               |      |       | ----- | ----- | ----- | ----- | 154.3 | 154.2 |
| 10a              |      |       | ----- | ----- | ----- | ----- | ----- | ----- |
| 11a              |      |       | 111.7 | 111.8 | 113.4 | 113.1 | ----- | ----- |
| 12a              |      |       | 67.6  | 67.6  | 44.6  | 44.1  | ----- | ----- |
| OCH <sub>3</sub> |      |       | 55.9  | 55.9  | 55.9  | 55.9  | 56.9  | 56.9  |
|                  |      |       | 56.4  | 56.4  | 56.3  | 56.4  |       |       |

**Table S10.** Crystal Data and Structure Refinement for Compound **11**

Identification code                      exp\_80 CD2

|                                             |                                                                |
|---------------------------------------------|----------------------------------------------------------------|
| Empirical formula                           | C <sub>21</sub> H <sub>20</sub> O <sub>5</sub>                 |
| Formula weight                              | 352.37                                                         |
| Temperature/K                               | 149.99(10)                                                     |
| Crystal system                              | Monoclinic                                                     |
| Space group                                 | P2 <sub>1</sub>                                                |
| a/Å                                         | 4.49030(10)                                                    |
| b/Å                                         | 28.1187(4)                                                     |
| c/Å                                         | 13.8306(3)                                                     |
| α/°                                         | 90                                                             |
| β/°                                         | 91.272(2)                                                      |
| γ/°                                         | 90                                                             |
| Volume/Å <sup>3</sup>                       | 1745.84(6)                                                     |
| Z                                           | 4                                                              |
| ρ <sub>calc</sub> /g/cm <sup>3</sup>        | 1.341                                                          |
| μ/mm <sup>-1</sup>                          | 0.095                                                          |
| F(000)                                      | 744.0                                                          |
| Crystal size/mm <sup>3</sup>                | 0.41 × 0.22 × 0.09                                             |
| Radiation                                   | MoKα (λ = 0.71073)                                             |
| 2θ range for data collection/°              | 4.132 to 61.38                                                 |
| Index ranges                                | -6 ≤ h ≤ 6, -40 ≤ k ≤ 40, -19 ≤ l ≤ 19                         |
| Reflections collected                       | 53882                                                          |
| Independent reflections                     | 10507 [R <sub>int</sub> = 0.0428, R <sub>sigma</sub> = 0.0359] |
| Data/restraints/parameters                  | 10507/1/475                                                    |
| Goodness-of-fit on F <sup>2</sup>           | 1.021                                                          |
| Final R indexes [I ≥ 2σ (I)]                | R <sub>1</sub> = 0.0398, wR <sub>2</sub> = 0.0935              |
| Final R indexes [all data]                  | R <sub>1</sub> = 0.0519, wR <sub>2</sub> = 0.0992              |
| Largest diff. peak/hole / e Å <sup>-3</sup> | 0.24/-0.17                                                     |
| Flack parameter                             | -0.2(3)                                                        |

**Table S11.** Crystal Data and Structure Refinement for Compound **20**

Code; pyn1808SNQ



C<sub>20</sub>H<sub>20</sub>O<sub>5</sub>

*Mr* = 340.38

Monoclinic, P21

Hall symbol: P 2yb

*a* = 10.9525 (1) Å

*b* = 6.5457 (1) Å

*c* = 11.3823 (1) Å

$\beta$  = 98.6335 (8)°

*V* = 806.77 (2) Å<sup>3</sup>

*Z* = 2

### Data collection

Super Nova, Dual, Cu at zero, EosS2 diffractometer

Radiation source: micro-focus sealed X-ray tube,

Super Nova (Cu) X-ray Source

Mirror monochromator

$\omega$  scans

*F*(000) = 360

*Dx* = 1.401 Mg m<sup>-3</sup>

Cu K $\alpha$  radiation,  $\lambda$  = 1.54184 Å

Cell parameters from 14561 reflections

$\theta$  = 5–74°

$\mu$  = 0.83 mm<sup>-1</sup>

*T* = 150 K

Prism, colourless

0.31 × 0.12 × 0.10 mm

Absorption correction: multi-scan

*Crys Alis PRO 1.171.39.46* (Rigaku Oxford

Diffraction, 2018) Empirical absorption correction

using spherical harmonics, implemented in SCALE ABSPACK scaling algorithm.

*T*<sub>min</sub> = 0.70, *T*<sub>max</sub> = 0.92

19610 measured reflections

3089 independent reflections

3064 reflections with *I* > 2.0 $\sigma$ (*I*)

*R*<sub>int</sub> = 0.031

$\theta_{\text{max}}$  = 73.7°,  $\theta_{\text{min}}$  = 3.9°

*h* = −13→13

*k* = −7→8

*l* = −14→14

### Refinement

Refinement on *F*<sup>2</sup>

Least-squares matrix: full

*R* [*F*<sup>2</sup> > 2 $\sigma$ (*F*<sup>2</sup>)] = 0.035

*wR*(*F*<sup>2</sup>) = 0.094

*S* = 1.00

3089 reflections

233 parameters

1 restraint

Primary atom site location: structure-invariant direct

methods

Hydrogen site location: difference Fourier map

H atoms treated by a mixture of independent and constrained refinement

Method = Modified Sheldrick *w* = 1/[ $\sigma^2$ (*F*<sup>2</sup>) + (0.08*P*)<sup>2</sup> + 0.06*P*],

where *P* = (max(*F*<sub>o</sub><sup>2</sup>, 0) + 2*F*<sub>c</sub><sup>2</sup>)/3

( $\Delta/\sigma$ )<sub>max</sub> = 0.0004

$\Delta\rho_{\text{max}}$  = 0.22 e Å<sup>-3</sup>

$\Delta\rho_{\text{min}}$  = −0.23 e Å<sup>-3</sup>

Absolute structure: Flack (1983), 1307 Friedel-pair

Absolute structure parameter: 0.19 (13)

| Compounds | Melting Point (°C) |                         | Optical rotation                                            |                                                                         |
|-----------|--------------------|-------------------------|-------------------------------------------------------------|-------------------------------------------------------------------------|
|           | Expt.              | Lit.                    | Expt.                                                       | Lit.                                                                    |
| <b>1</b>  | -----              | 221.5 -233 <sup>1</sup> | $[\alpha]^{21} +12.9^\circ$ (c 0.3 in CHCl <sub>3</sub> )   | -----                                                                   |
| <b>2</b>  | 210                | 225 <sup>10</sup>       | $[\alpha]^{25} -176^\circ$ (c 0.3 in CHCl <sub>3</sub> )    | -----                                                                   |
| <b>3</b>  | 69-71              | -----                   | $[\alpha]^{21} +18.9^\circ$ (c 0.3 in CHCl <sub>3</sub> )   | -----                                                                   |
| <b>4</b>  | -----              | 125-127 <sup>3</sup>    | $[\alpha]^{25} -192^\circ$ (c 0.05 in CHCl <sub>3</sub> )   | $[\alpha]_D -214^\circ$ (c 0.01 in CHCl <sub>3</sub> ) <sup>3</sup>     |
| <b>5</b>  | 150-152            | 170-171 <sup>14</sup>   | $[\alpha]^{21} -43.2^\circ$ (c 0.2 in CHCl <sub>3</sub> )   | $[\alpha]^{22} -51^\circ$ (c 2 in CHCl <sub>3</sub> ) <sup>14</sup>     |
| <b>6</b>  | 204-205            | 204-205 <sup>10</sup>   | $[\alpha]^{26} -189.5^\circ$ (c 0.01 in CHCl <sub>3</sub> ) | $[\alpha]_D 0^\circ$ (Benzene or MeOH) <sup>10</sup>                    |
| <b>7</b>  | 174-175            | 180-181 <sup>10</sup>   | $[\alpha]^{26} -232.2^\circ$ (c 0.4 CHCl <sub>3</sub> )     | $[\alpha]_D 0^\circ$ (CHCl <sub>3</sub> or Benzene) <sup>10</sup>       |
| <b>8</b>  | 133-135            | -----                   | $[\alpha]^{22} -11.2^\circ$ (c 0.2 CHCl <sub>3</sub> )      | -----                                                                   |
| <b>9</b>  | 155-156            | 189 <sup>10</sup>       | $[\alpha]^{23} -173.2^\circ$ (c 0.3 in CHCl <sub>3</sub> )  | -----                                                                   |
| <b>10</b> | 220                | 235 <sup>10</sup>       | $[\alpha]^{23} +139.7^\circ$ (c 0.2 in CHCl <sub>3</sub> )  | $[\alpha]^{23} +135^\circ$ (c 1.3 in CHCl <sub>3</sub> ) <sup>10</sup>  |
| <b>11</b> | 149-152            | 146-147 <sup>7</sup>    | $[\alpha]^{23} -339.5^\circ$ (c 0.1 in CHCl <sub>3</sub> )  | $[\alpha]^{23} -261.9^\circ$ (c 0.8 in CHCl <sub>3</sub> ) <sup>7</sup> |
| <b>12</b> | -----              | 115-116 <sup>5</sup>    | $[\alpha]^{24} -102.2^\circ$ (c 0.8 in CHCl <sub>3</sub> )  | $[\alpha]^{20} 0^\circ$ (CHCl <sub>3</sub> ) <sup>4</sup>               |
| <b>13</b> | 172-174            | 93-95 <sup>6</sup>      | $[\alpha]^{21} -127.2^\circ$ (c 0.2 in CHCl <sub>3</sub> )  | $[\alpha]_D -273^\circ$ (c 0.08 in CHCl <sub>3</sub> ) <sup>1</sup>     |
| <b>14</b> | -----              | 154-155 <sup>11</sup>   | $[\alpha]^{21} -234.6^\circ$ (c 0.1 in CHCl <sub>3</sub> )  | $[\alpha]^{22} -291^\circ$ (c 0.3 in CHCl <sub>3</sub> ) <sup>11</sup>  |
| <b>15</b> | 223-225            | 238-239 <sup>8</sup>    | $[\alpha]^{23} -107.4^\circ$ (c 0.3 in CHCl <sub>3</sub> )  | $[\alpha]^{23} -227.7^\circ$ (c 0.8 in CHCl <sub>3</sub> ) <sup>8</sup> |
| <b>16</b> | 159-162            | 162-164 <sup>12</sup>   | $[\alpha]^{24} -236^\circ$ (c 0.3 in CHCl <sub>3</sub> )    | $[\alpha]_D -199^\circ$ (CHCl <sub>3</sub> ) <sup>12</sup>              |
| <b>17</b> | 152-154            | 87-90 <sup>10, 12</sup> | $[\alpha]^{20} -59.2^\circ$ (c 0.5 in CHCl <sub>3</sub> )   | -----                                                                   |
| <b>18</b> | 237-239            | 239-240 <sup>10</sup>   | $[\alpha]^{26} -152.6^\circ$ (c 0.1 in CHCl <sub>3</sub> )  | -----                                                                   |
| <b>19</b> | 194-196            | 146-147 <sup>9</sup>    | $[\alpha]^{21} -161.4^\circ$ (c 0.1 in MeOH)                | $[\alpha]^{23} -201.0^\circ$ (c 0.8 in MeOH) <sup>9</sup>               |
| <b>20</b> | 209-213            | 215-216 <sup>9</sup>    | $[\alpha]^{21} -208.5^\circ$ (c 0.1 in MeOH)                | $[\alpha]^{23} -194.5^\circ$ (c 0.6 in MeOH) <sup>9</sup>               |

|  |  |  |  |  |
|--|--|--|--|--|
|  |  |  |  |  |
|--|--|--|--|--|

**Table S12.** Melting Point and Optical Rotation Literature and experimental Data of Compounds 1-20

cjd\_180203\_37  
F15F7F2TLC CARBON

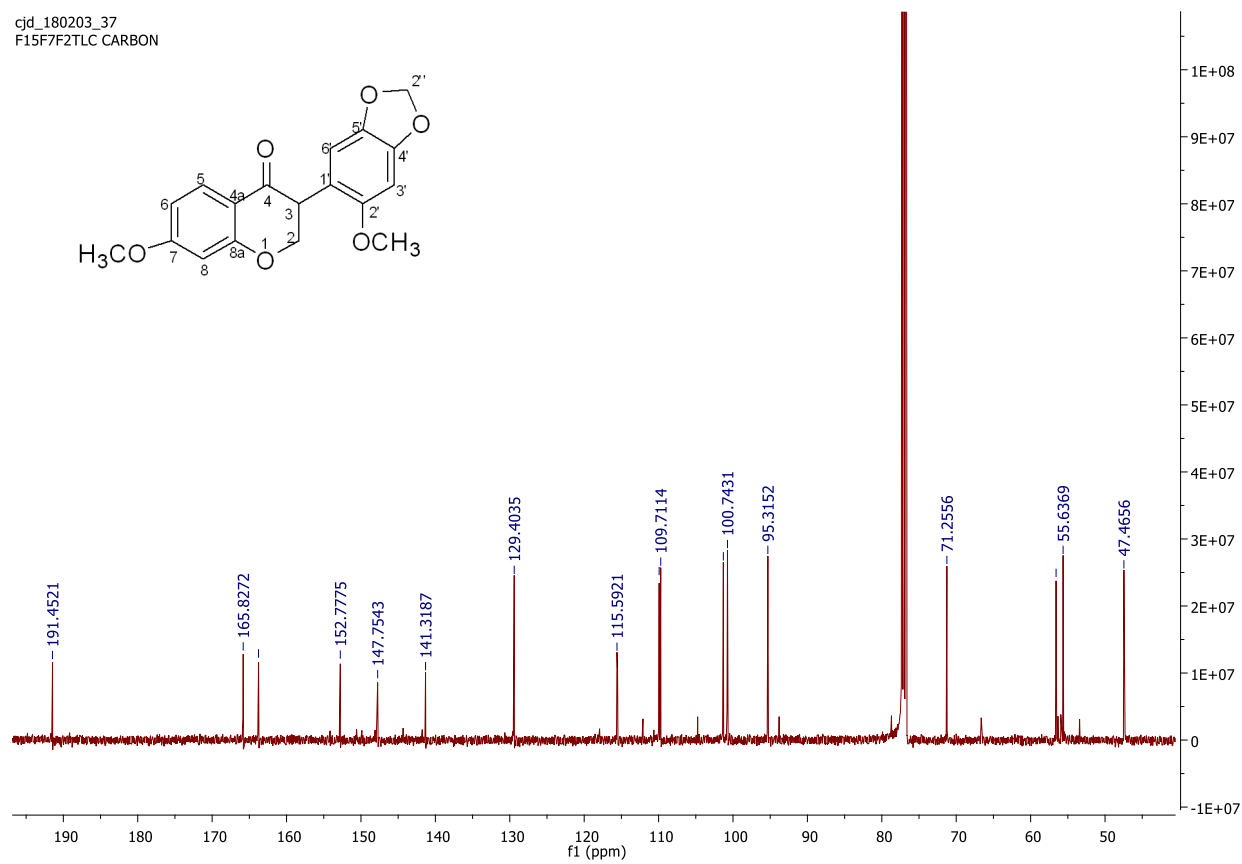

**Figure S20.** <sup>13</sup>CNMR Spectrum of Compound **8** (126 MHz, CDCl<sub>3</sub>)

cjd\_180203\_37  
F15F7F2TLC DEPT

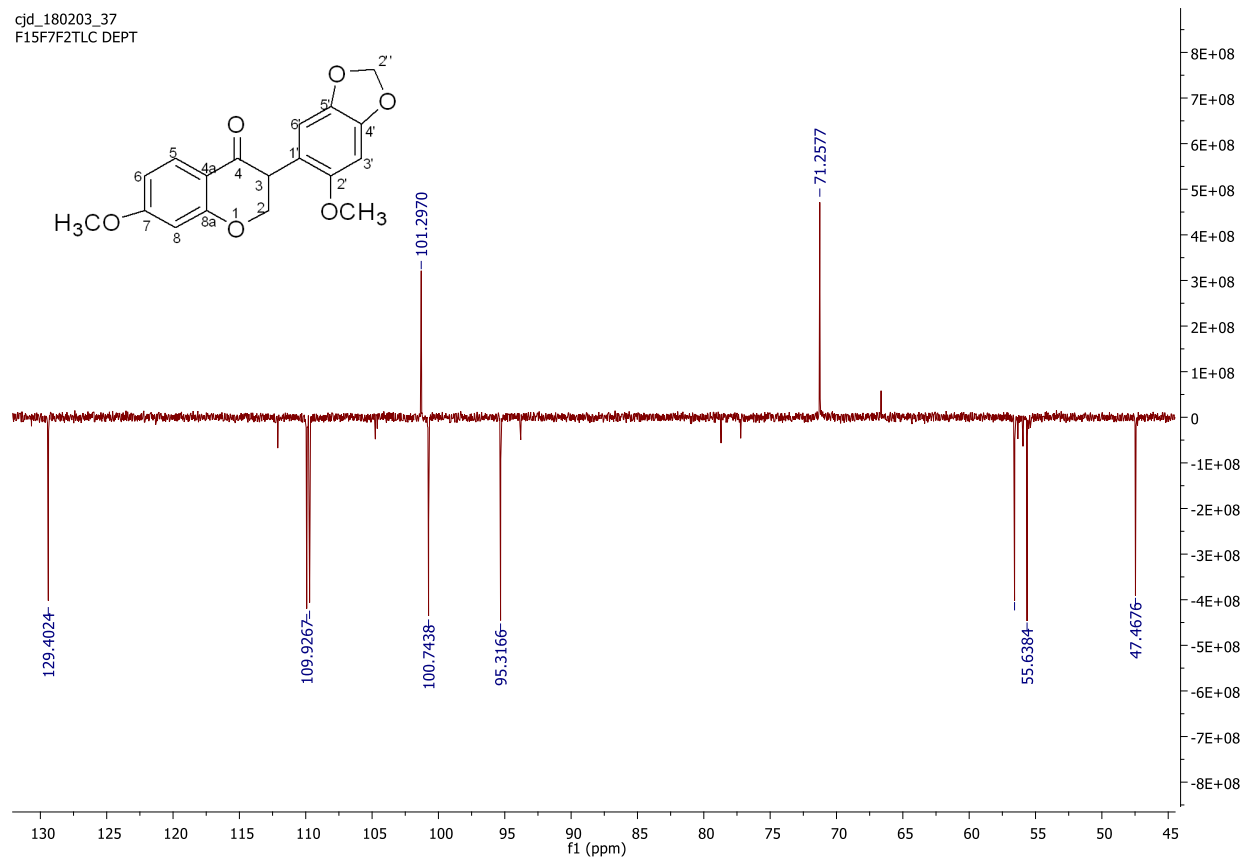

**Figure S21.** DEPT Spectrum of Compound **8** (500 MHz,  $\text{CDCl}_3$ )

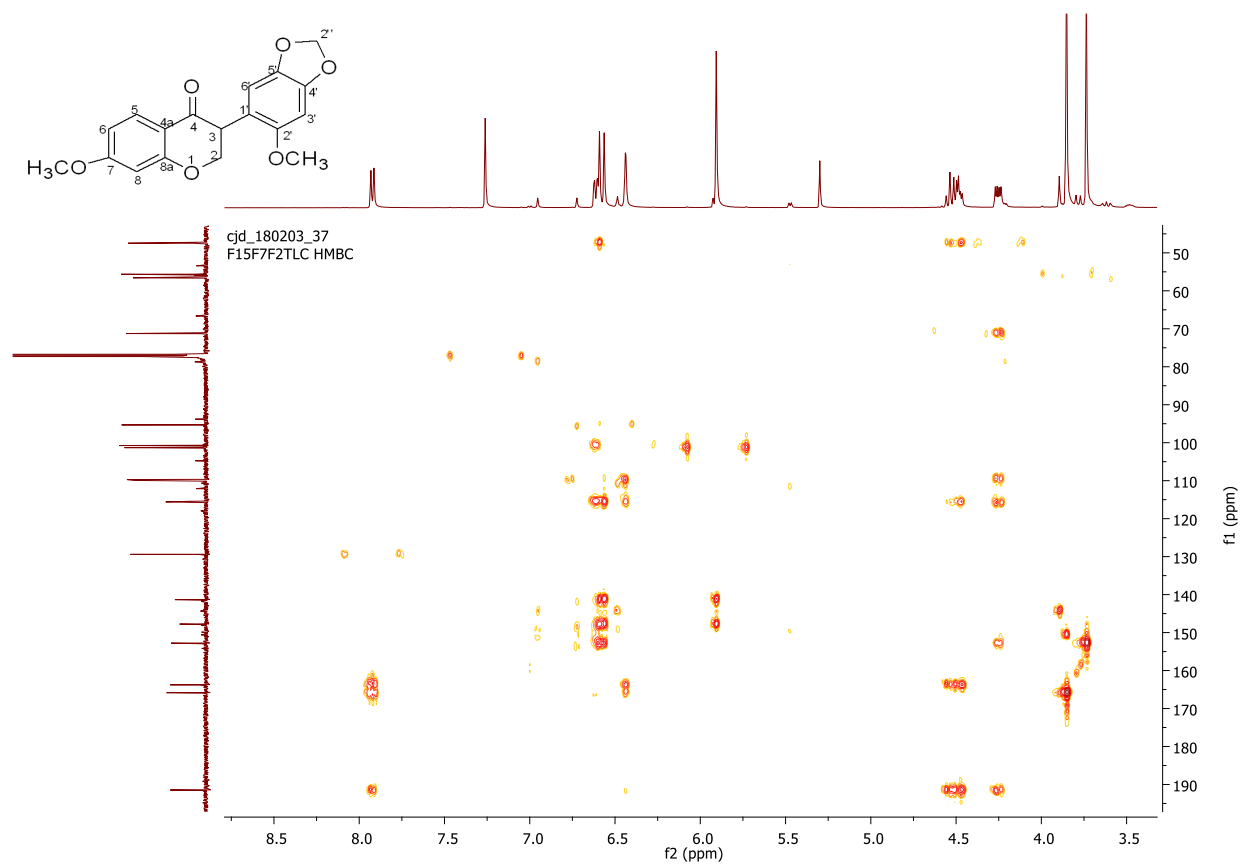

**Figure S22.** HSQC Spectrum of Compound **8** (500 MHz, CDCl<sub>3</sub>)

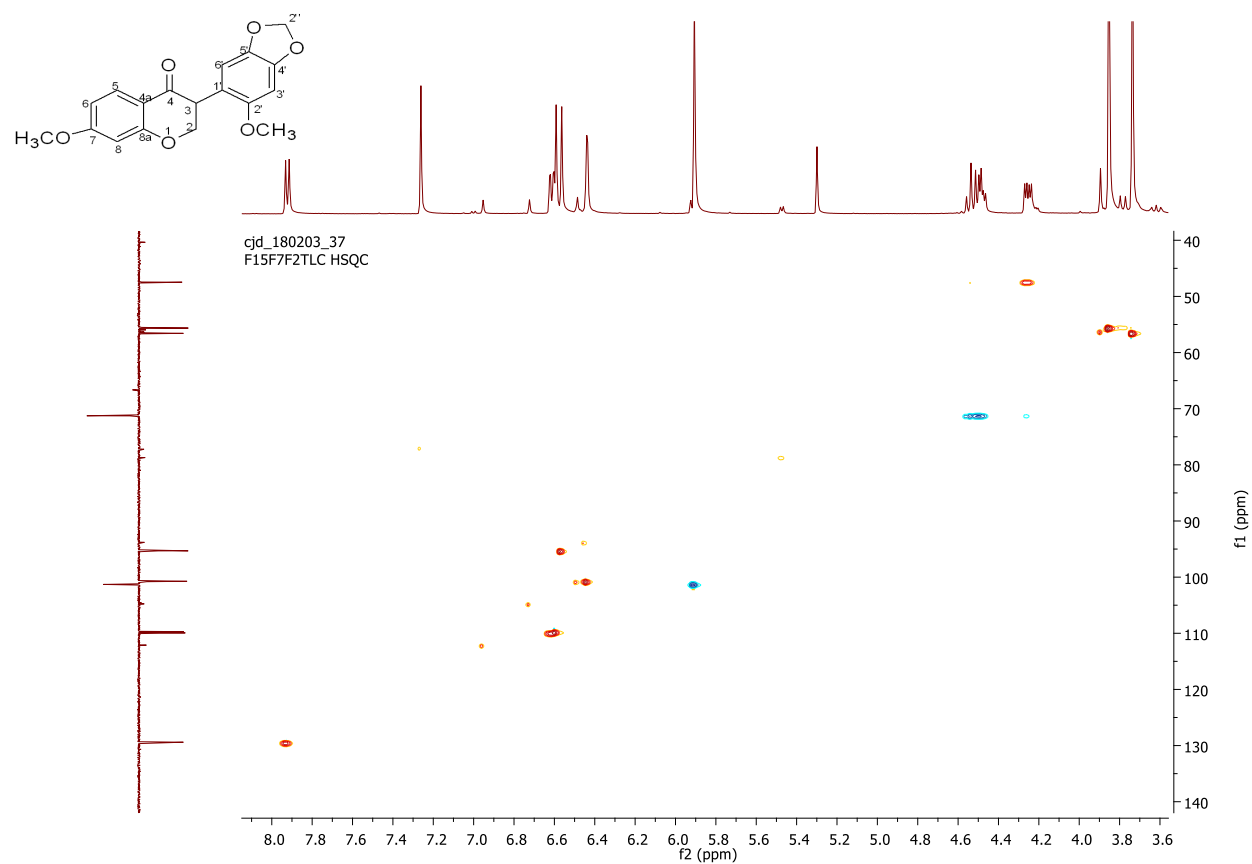

**Figure S23.** HSQC Spectrum of Compound **8** (500 MHz, CDCl<sub>3</sub>)

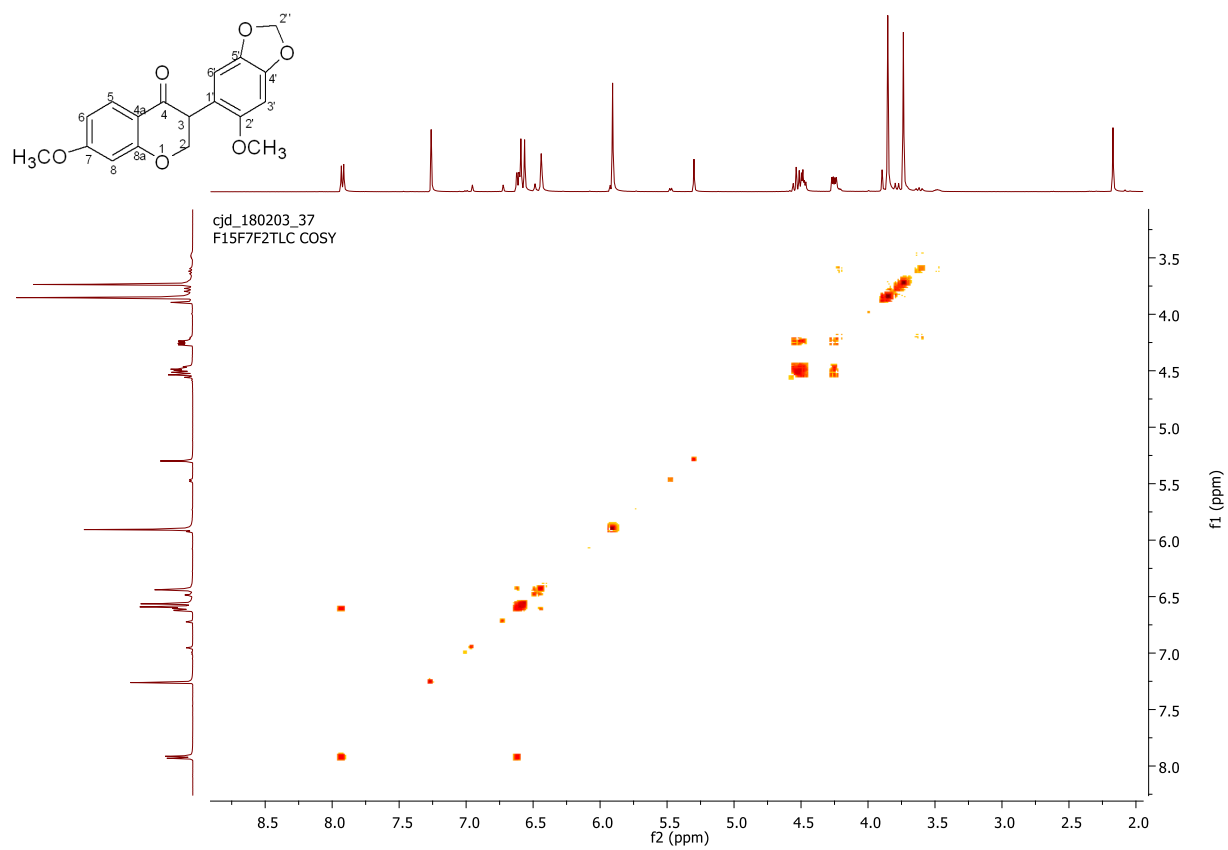

**Figure S24.** COSY Spectrum of Compound **8** (500 MHz,  $\text{CDCl}_3$ )



# Elemental Composition Report

Page 1

## Single Mass Analysis

Tolerance = 5.0 PPM / DBE: min = -1.5, max = 120.0

Element prediction: Off

Number of isotope peaks used for i-FIT = 3

Monoisotopic Mass, Even Electron Ions

746 formula(e) evaluated with 4 results within limits (up to 15 closest results for each mass)

Elements Used:

C: 9-44 H: 0-75 N: 0-10 O: 0-12 Na: 0-1

F15F7F2TLC

SP\_CDawurung F15F7F2TLC 88 (2.108) Cm (81:89)

1: TOF MS ES+  
5.54e+003

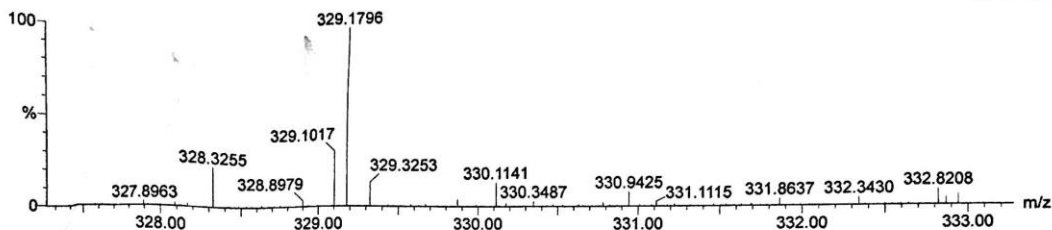

Minimum: -1.5  
Maximum: 55.0 5.0 120.0

| Mass     | Calc. Mass | mDa  | PPM  | DBE  | i-FIT | i-FIT (Norm) | Formula       |
|----------|------------|------|------|------|-------|--------------|---------------|
| 329.1017 | 329.1014   | 0.3  | 0.9  | 12.5 | 278.6 | 1.4          | C17 H14 N4 O2 |
|          | 329.1012   | 0.5  | 1.5  | 16.5 | 279.1 | 1.9          | Na C15 H9 N10 |
|          | 329.1025   | -0.8 | -2.4 | 10.5 | 278.0 | 0.8          | C18 H17 O6    |
|          | 329.1001   | 1.6  | 4.9  | 7.5  | 279.1 | 1.8          | C16 H18 O6 Na |

MS for compound 8

## References

1. Brink, A.J., Rall, G.J.H., Engelbrecht, J., 1974. Structures of some minor pterocarpan of *Neorautanenia edulis*. *Phytochemistry* 8, 1581-1585. [https://doi.org/10.1016/0031-9422\(74\)80332-8](https://doi.org/10.1016/0031-9422(74)80332-8).
2. Fraga, B.M., Gonzalez-Coloma A., Alegre-Gomez, S., Lopez-Rodriguez, M., Amador, L. J., Daiz, C. E., 2017. Bioactive constituents from transformed root cultures of *Nepeta teydea*. *Phytochemistry*. 133:59-69. <https://doi.org/10.1016/j.phytochem.2016.10.008>.
3. Breytenbach, J.C., Rall, G.J.H., 1980. Structure and synthesis of isoflavonoid analogues from *Neorautanenia amboensis* Schinz. *J. Chem. Soc, Perkin Trans. 0*, 1804-1809. <https://doi.org/10.1039/P19800001804>.
4. Crombie, L., Whiting, D. A., 1963. The extractives of *Neorautanenia pseudopachyrrhiza* the isolation and structure of a new rotenoid and two isoflavanones. *J. Chem. Soc.* 1963, 1569-1579.
5. Mitscher, L.A., Okwute, S.K., Gollapudi, S.R., Drake, S., Avona, E., 1988. Antimicrobial pterocarpan of Nigerian *Erythrina mildbraedii*. *Phytochemistry*. 11, 3449-3452. [https://doi.org/10.1016/0031-9422\(88\)80746-5](https://doi.org/10.1016/0031-9422(88)80746-5).
6. Rall, G.J.H., Engelbreght, J.P., Brink, A.J., 1971. The chemistry of *Neorautanenia edulis* G.A. Sm. The constitution of (-)-2-isopentenyl-3-hydroxy-8-9 methylenedioxypterocarpan, a new pterocarpan from the root bark. *J. South Afri. Chem. Inst.* 26, 56-60.
7. Rall, G.J.H., Engelbreght, J.P., Brink, A.J., 1970. The isolation, structure and absolute configuration of (-)-2-hydroxypterocarpin from *Neorautanenia edulis*. *Tetrahedron*. 26, 507-5012.
8. Sakurai, Y., Sakurai, N., Masahiko, T., Nakanishi, Y., Bastow, K.F., Wang, X., Cragg, G.M., Lee, K.H., 2006. Rautandiols A and B, pterocarpan and cytotoxic constituents from *Neorautanenia mitis* J. *Nat. Prod.*, 69, 397-399. <https://doi.org/10.1021/np058070c>.
9. Puyvelde, L.V., Norbert, D., Kimpe, N.D., Jean-Pierre, Mudaheranwa, J.P., Gasiga, A., Schamp, N., Jean-Paul, Declercq, J.P., Meerssche, M.V., 1987. Isolation and structure elucidation of potentially insecticidal and acaricidal isoflavone- type compounds from *Neorautanenia mitis*. *J. Nat. Prod.* 50, 349-56. <https://doi.org/10.1021/np50051a002>.
10. Nkengfack, A.E., Vardamides, J.C., Z.; Tanee Fomum, Z.T., Meyer, M., 1995. Prenylated Isoflavanone from *Erythrina eriotricha*. *Phytochemistry*. 6, 1803-1808. [https://doi.org/10.1016/0031-9422\(95\)00037-8](https://doi.org/10.1016/0031-9422(95)00037-8).
11. Oberholzer, M.E., Rall, G.J.H., Roux, D.G., 1974. The concurrence of 12a-hydroxy- and 12a-O-methylrotenoids. Isolation of the first natural 12a-O-methylrotenoids. *Tetrahedron Letters*. 25, 2211-2214.
12. Phrutivorapongkul, A., Lipipun, V., Ruangrunsi, N., Watanabe, T., Ishikawa, T., 2002. Studies of the constituents of seeds of *Pachyrrhizus erosus* and their anti-herpes simplex virus (HSV) activities. *Chem. Pharm. Bull.* 50, 534-537. <https://doi.org/10.1248/cpb.50.534>.
13. Chaturvedula, V.S.P., Prakash, I., 2012. Isolation of Stigmasterol and  $\beta$ -Sitosterol from the dichloromethane extract of *Rubus suavissimus*. *ICPJ*. 9, 239-242. <https://doi.org/10.3329/icpj.v1i9.11613>.

14. Van Duuren, B.L., 1961. Chemistry of edulin, Neorautone, and related compounds from *Neorautanenia edulis* C.A. Sm. J. Org. Chem. 12, 5013-5020.  
<https://doi.org/10.1021/jo01070a057>.
